# Supplementary material for: Development of GSK's NMR guides – a tool to encourage the use of more sustainable solvents
Source: Royal Society of Chemistry journal article supplement (doi:10.1039/c6gc00446f), 2016-01-01
Supplement: c6gc00446f1.pdf [file c6gc00446f1.pdf]

Electronic Supplementary Information for:

## **Development of GSK's NMR Guides – A tool to encourage the use of more sustainable solvents**

**Hugo E. Gottlieb,<sup>a</sup> Grazyna Graczyk-Millbrandt,<sup>b</sup> Graham G. A. Inglis,<sup>c</sup> Abraham Nudelman,<sup>a</sup> David Perez,<sup>d</sup> Yanqiu Qian,<sup>b</sup> Leanna E. Shuster,<sup>\*e</sup> Helen F. Sneddon,<sup>c</sup> and Richard J. Upton.<sup>c</sup>**

<sup>a</sup> *Department of Chemistry, Bar-Ilan University, Ramat-Gan 52900, Israel*

<sup>b</sup> *GSK, 709 Swedeland Road, King of Prussia, PA 19406, USA*

<sup>c</sup> *GSK, Medicines Research Centre, Gunnels Wood Road, Stevenage, Herts., UK, SG1 2NY.*

<sup>d</sup> *C2M Aurochs Industrie, 3 Impasse du lac, Z.I. de la Plaine, 31140 Aucamville, France*

<sup>e</sup> *GSK, 1250 South Collegeville Road, Collegeville, PA 19426, USA. Fax: 610-917-7393; Tel: 610-917-4489; E-mail: [leanna.e.shuster@gsk.com](mailto:leanna.e.shuster@gsk.com)*

### Table of Contents:

Section 1: Key to annotations in NMR data tables

Section 2: Compiled <sup>1</sup>H NMR chemical shifts, listed alphabetically by solvent

Section 3: Compiled <sup>13</sup>C NMR chemical shifts, listed alphabetically by solvent

## Section 1:

| Annotation                                                                                                                                                                                                                                                                     | Explanation                                                                                                                                                                                                                                                                                                                                                                                                              |
|--------------------------------------------------------------------------------------------------------------------------------------------------------------------------------------------------------------------------------------------------------------------------------|--------------------------------------------------------------------------------------------------------------------------------------------------------------------------------------------------------------------------------------------------------------------------------------------------------------------------------------------------------------------------------------------------------------------------|
| *                                                                                                                                                                                                                                                                              | This peak as recorded in this deuterated solvent appears with a different multiplicity than as indicated in the table. Some instances in D <sub>2</sub> O or methanol- <i>d</i> <sub>4</sub> are due to lack of coupling to H-bonded protons. In a few cases this results from overlap of analyte peaks with the solvent or water signals.                                                                               |
| +                                                                                                                                                                                                                                                                              | Multiple peaks are overlapping to form a multiplet that cannot be fully resolved                                                                                                                                                                                                                                                                                                                                         |
| R                                                                                                                                                                                                                                                                              | The analyte and deuterated solvents are reactive with each other                                                                                                                                                                                                                                                                                                                                                         |
| N/O                                                                                                                                                                                                                                                                            | This peak was not observed in the given spectrum.                                                                                                                                                                                                                                                                                                                                                                        |
| a                                                                                                                                                                                                                                                                              | For the <sup>1</sup> H NMR spectrum of glycerol in acetone- <i>d</i> <sub>6</sub> , the shifts for all 6 carbon-bonded protons appear overlapped as a single, complex multiplet.                                                                                                                                                                                                                                         |
| b                                                                                                                                                                                                                                                                              | Peak assignments made on the basis of H-H COSY and HSQC 2D NMR spectra.                                                                                                                                                                                                                                                                                                                                                  |
| c                                                                                                                                                                                                                                                                              | This peak is listed as a methylene group, but the two protons are non-equivalent, therefore this peak represents only a single proton.                                                                                                                                                                                                                                                                                   |
| d                                                                                                                                                                                                                                                                              | Peak assignments made on the basis of H-H COSY, HSQC, HMQC, APT, and nOe 2D NMR spectra.                                                                                                                                                                                                                                                                                                                                 |
| e                                                                                                                                                                                                                                                                              | This peak represents 6 methylene protons from the cyclopentyl ring of CPME.                                                                                                                                                                                                                                                                                                                                              |
| f                                                                                                                                                                                                                                                                              | This peak represents 4 methylene protons from the cyclopentyl ring of CPME.                                                                                                                                                                                                                                                                                                                                              |
| g                                                                                                                                                                                                                                                                              | For dimethyl isosorbide in CD <sub>3</sub> CN, one of the two protons which overlap in the other examined deuterated solvents to form the complex multiplet listed as “CH <sub>2</sub> C(OMe) + CH(OMe)” on this table instead overlaps with the CH <sub>2</sub> O multiplet at 3.76-3.80 ppm. In CD <sub>3</sub> CN only, the peak at 3.76-3.80 therefore represents 2H, while the peak at 3.80-3.84 ppm represents 1H. |
|                                                                                                                                                                                               | Solvent is classified as amber by the GSK Solvent Sustainability Guide                                                                                                                                                                                                                                                                                                                                                   |
|                                                                                                                                                                                               | Solvent is classified as green by the GSK Solvent Sustainability Guide                                                                                                                                                                                                                                                                                                                                                   |
| Note: For data taken from literature references, most peaks labeled as multiplets reported a single chemical shift value and are therefore not shown here as a range, while those determined for this work are reported as a range, encompassing the full width of the signal. |                                                                                                                                                                                                                                                                                                                                                                                                                          |

**Table 1: Reference for all annotations and notes used in NMR chemical shift figures**

## Section 2:

### NMR Shifts for Residual Solvent Impurities (<sup>1</sup>H)

| Solvent (bp)                        |                                                                                     |                                   |    | D <sub>2</sub> O       | (CD <sub>3</sub> ) <sub>2</sub> SO | (CD <sub>3</sub> ) <sub>2</sub> CO | CD <sub>3</sub> CN     | CD <sub>3</sub> OD     | CDCl <sub>3</sub>      |
|-------------------------------------|-------------------------------------------------------------------------------------|-----------------------------------|----|------------------------|------------------------------------|------------------------------------|------------------------|------------------------|------------------------|
| Acetic acid (118°C)                 |    | CH <sub>3</sub>                   | s  | 2.08                   | 1.91                               | 1.96                               | 1.96                   | 1.99                   | 2.10                   |
| Acetone (56°C)                      |    | CH <sub>3</sub>                   | s  | 2.22                   | 2.09                               | 2.09                               | 2.08                   | 2.15                   | 2.17                   |
| Acetonitrile (82°C)                 |    | CH <sub>3</sub>                   | s  | 2.06                   | 2.07                               | 2.05                               | 1.96                   | 2.03                   | 2.10                   |
| <i>t</i> -Amyl alcohol (102°C)      |    | CH <sub>3</sub>                   | t  | 0.89                   | 0.82                               | 0.89                               | 0.87                   | 0.91                   | 0.92                   |
|                                     |                                                                                     | (CH <sub>3</sub> ) <sub>2</sub>   | s  | 1.19                   | 1.05                               | 1.13                               | 1.11                   | 1.15                   | 1.20                   |
|                                     |                                                                                     | CH <sub>2</sub>                   | q  | 1.51                   | 1.35                               | 1.45                               | 1.43                   | 1.48                   | 1.51                   |
|                                     |                                                                                     | OH                                | s  | N/O                    | 4.02                               | 3.06                               | 2.25                   | N/O                    | 1.29                   |
| <i>t</i> -Amyl methyl ether (85°C)  |    | CH <sub>3</sub> CH <sub>2</sub>   | t  | 0.85                   | 0.79                               | 0.83                               | 0.83                   | 0.86                   | 0.87                   |
|                                     |                                                                                     | (CH <sub>3</sub> ) <sub>2</sub> C | s  | 1.17                   | 1.05                               | 1.07                               | 1.08                   | 1.13                   | 1.13                   |
|                                     |                                                                                     | CH <sub>2</sub>                   | q  | 1.55                   | 1.42                               | 1.46                               | 1.46                   | 1.51                   | 1.49                   |
|                                     |                                                                                     | CH <sub>3</sub> O                 | s  | 3.20                   | 3.05                               | 3.10                               | 3.10                   | 3.17                   | 3.18                   |
| Anisole (154°C)                     |    | CH <sub>3</sub>                   | s  | 3.85                   | 3.74                               | 3.78                               | 3.77                   | 3.77                   | 3.81                   |
|                                     |                                                                                     | CH( <i>o/p</i> )                  | m  | 7.01-7.10              | 6.89-6.97                          | 6.88-6.95                          | 6.89-6.98              | 6.85-6.95              | 6.87-6.98              |
|                                     |                                                                                     | CH( <i>m</i> )                    | m  | 7.36-7.45              | 7.25-7.33                          | 7.24-7.31                          | 7.27-7.34              | 7.20-7.28              | 7.26-7.32              |
| 1-Butanol (118°C)                   |    | CH <sub>3</sub>                   | t  | 0.91                   | 0.87                               | 0.90                               | 0.91                   | 0.93                   | 0.94                   |
|                                     |                                                                                     | CH <sub>2</sub> (3)               | m  | 1.30-1.40              | 1.25-1.34                          | 1.31-1.41                          | 1.29-1.39              | 1.34-1.43              | 1.33-1.45              |
|                                     |                                                                                     | CH <sub>2</sub> (2)               | m  | 1.49-1.56              | 1.35-1.43                          | 1.44-1.52                          | 1.42-1.49              | 1.47-1.55              | 1.52-1.59              |
|                                     |                                                                                     | OH                                | t  | --                     | 4.30                               | 3.35                               | 2.44                   | --                     | --                     |
|                                     |                                                                                     | CH <sub>2</sub> (1)               | m  | 3.61                   | 3.38                               | 3.49-3.56                          | 3.45-3.51              | 3.54                   | 3.65                   |
| 2-Butanol (100°C)                   |    | CH <sub>3</sub> (4)               | t  | 0.89                   | 0.83                               | 0.89                               | 0.88                   | 0.91                   | 0.93                   |
|                                     |                                                                                     | CH <sub>3</sub> (1)               | d  | 1.16                   | 1.02                               | 1.09                               | 1.08                   | 1.13                   | 1.19                   |
|                                     |                                                                                     | CH <sub>2</sub>                   | m  | 1.43-1.52              | 1.25-1.40                          | 1.33-1.47                          | 1.33-1.42              | 1.36-1.52              | 1.42-1.54              |
|                                     |                                                                                     | OH                                | d  | --                     | 4.29                               | 3.33                               | 2.47                   | --                     | 1.40*                  |
|                                     |                                                                                     | CH                                | m  | 3.71-3.80              | 3.44-3.54                          | 3.56-3.66                          | 3.54-3.62              | 3.59-3.67              | 3.68-3.79              |
| <i>t</i> -Butanol (82°C)            |   | CH <sub>3</sub>                   | s  | 1.24                   | 1.11                               | 1.18                               | 1.16                   | 1.40                   | 1.28                   |
|                                     |                                                                                     | OH                                | s  | --                     | 4.19                               | --                                 | 2.18                   | --                     | --                     |
| <i>n</i> -Butyl acetate (126°C)     |  | CH <sub>3</sub> CH <sub>2</sub>   | t  | 0.91                   | 0.89                               | 0.92                               | 0.92                   | 0.94                   | 0.94                   |
|                                     |                                                                                     | CH <sub>2</sub>                   | m  | 1.31-1.43              | 1.27-1.37                          | 1.32-1.43                          | 1.31-1.42              | 1.33-1.45              | 1.34-1.43              |
|                                     |                                                                                     | CH <sub>2</sub>                   | m  | 1.59-1.68              | 1.50-1.58                          | 1.54-1.62                          | 1.54-1.63              | 1.55-1.65              | 1.57-1.65              |
|                                     |                                                                                     | CH <sub>3</sub> CO                | s  | 2.09                   | 1.99                               | 1.97                               | 1.97                   | 2.01                   | 2.04                   |
|                                     |                                                                                     | CH <sub>2</sub> CO                | t  | 4.12                   | 3.99                               | 4.02                               | 4.02                   | 4.06                   | 4.07                   |
| <i>t</i> -Butyl acetate (95°C)      |  | CH <sub>3</sub> CO                | s  | 1.46                   | 1.39                               | 1.41                               | 1.42                   | 1.44                   | 1.45                   |
|                                     |                                                                                     | (CH <sub>3</sub> ) <sub>3</sub> C | s  | 2.02                   | 1.91                               | 1.89                               | 1.90                   | 1.93                   | 1.96                   |
| <i>t</i> -Butyl ethyl ether (70°C)  |  | CH <sub>3</sub> CH <sub>2</sub>   | t  | 1.15                   | 1.04                               | 1.06                               | 1.07                   | 1.13                   | 1.16                   |
|                                     |                                                                                     | CCH <sub>3</sub>                  | s  | 1.23                   | 1.12                               | 1.14                               | 1.14                   | 1.19                   | 1.20                   |
|                                     |                                                                                     | CH <sub>2</sub>                   | q  | 3.54                   | 3.32                               | 3.37                               | 3.38                   | 3.45                   | 3.41                   |
| <i>t</i> -Butyl methyl ether (55°C) |                                                                                     | CCH <sub>3</sub>                  | s  | 1.21                   | 1.11                               | 1.13                               | 1.14                   | 1.15                   | 1.19                   |
|                                     |                                                                                     | OCH <sub>3</sub>                  | s  | 3.22                   | 3.08                               | 3.13                               | 3.13                   | 3.20                   | 3.22                   |
| Butylene carbonate (250°C)          |  | CH <sub>3</sub>                   | t  | 0.98                   | 0.91                               | 0.99                               | 0.96                   | R                      | 1.04                   |
|                                     |                                                                                     | CH <sub>2</sub> CH <sub>3</sub>   | m  | 1.74-1.88              | 1.70*                              | 1.80                               | 1.67-1.81              | --                     | 1.71-1.88              |
|                                     |                                                                                     | CH <sub>2</sub> O <sup>1</sup>    | dd | 4.28                   | 4.14                               | 4.17                               | 4.08                   | --                     | 4.09                   |
|                                     |                                                                                     | CH <sub>2</sub> O <sup>1</sup>    | t  | 4.67                   | 4.55                               | 4.61                               | 4.51                   | --                     | 4.53                   |
|                                     |                                                                                     | CHO                               | m  | 4.85-4.92              | 4.74                               | 4.73-4.80                          | 4.64-4.71              | --                     | 4.60*                  |
| Chloroform (61°C)                   |                                                                                     | CH                                | s  | insoluble              | 8.32                               | 8.02                               | 7.58                   | 7.90                   | 7.26                   |
| 2,4,6-Collidine (171°C)             |  | CH <sub>3</sub> ( <i>p</i> )      | s  | 2.25                   | 2.21                               | 2.23                               | 2.23                   | 2.28                   | 2.26                   |
|                                     |                                                                                     | CH <sub>3</sub> ( <i>m</i> )      | s  | 2.39                   | 2.36                               | 2.37                               | 2.38                   | 2.43                   | 2.47                   |
|                                     |                                                                                     | CH                                | s  | 6.91                   | 6.85                               | 6.82                               | 6.83                   | 6.91                   | 6.78                   |
| Cyclohexane (81°C)                  |  | CH <sub>2</sub>                   | s  | insoluble              | 1.40                               | 1.43                               | 1.44                   | 1.45                   | 1.43                   |
| Cyclohexanone (155°C)               |  | CH <sub>2</sub> (4)               | m  | 1.69-1.76              | 1.61-1.68                          | 1.69-1.75                          | 1.66-1.73              | R                      | 1.69-1.76              |
|                                     |                                                                                     | CH <sub>2</sub> (3)               | m  | 1.83-1.91              | 1.73-1.79                          | 1.78-1.85                          | 1.78-1.85              | --                     | 1.83-1.90              |
|                                     |                                                                                     | CH <sub>2</sub> CO                | t  | 2.39                   | 2.25                               | 2.27                               | 2.27                   | --                     | 2.34                   |
| Cyclopentyl methyl ether (106°C)    |  | CH <sub>2</sub>                   | m  | 1.52-1.68 <sup>e</sup> | 1.41-1.51                          | 1.44-1.54                          | 1.45-1.55              | 1.47-1.59              | 1.47-1.57              |
|                                     |                                                                                     | CH <sub>2</sub>                   | m  | 1.74-1.85              | 1.51-1.59 <sup>f</sup>             | 1.55-1.71 <sup>e</sup>             | 1.55-1.64 <sup>f</sup> | 1.60-1.68 <sup>f</sup> | 1.60-1.75 <sup>e</sup> |
|                                     |                                                                                     | CH <sub>2</sub>                   | m  | --                     | 1.59-1.67                          | --                                 | 1.64-1.73              | 1.69-1.76              | --                     |
|                                     |                                                                                     | CH <sub>3</sub>                   | s  | 3.30                   | 3.15                               | 3.19                               | 3.20                   | 3.26                   | 3.28                   |
|                                     |                                                                                     | CH                                | m  | 3.94-3.99              | 3.69-3.77                          | 3.72-3.77                          | 3.73-3.80              | 3.80-3.86              | 3.77-3.82              |

# NMR Shifts for Residual Solvent Impurities (<sup>1</sup>H)

| Solvent (bp)                            |                                                                                                                     |     | D <sub>2</sub> O | (CD <sub>3</sub> ) <sub>2</sub> SO | (CD <sub>3</sub> ) <sub>2</sub> CO | CD <sub>3</sub> CN     | CD <sub>3</sub> OD | CDCl <sub>3</sub> |
|-----------------------------------------|---------------------------------------------------------------------------------------------------------------------|-----|------------------|------------------------------------|------------------------------------|------------------------|--------------------|-------------------|
| <i>p</i> -Cymene <sup>b</sup> (177°C)   |  CH <sub>3</sub> CH                | d   | insoluble        | 1.17                               | 1.20                               | 1.20                   | 1.21               | 1.23              |
|                                         | CH <sub>3</sub> Ar                                                                                                  | s   | --               | 2.25                               | 2.27                               | 2.28                   | 2.27               | 2.32              |
|                                         | CH(CH <sub>3</sub> ) <sub>2</sub>                                                                                   | spt | --               | 2.83                               | 2.85                               | 2.85                   | 2.83               | 2.87              |
|                                         | ArCH                                                                                                                | m   | --               | 7.05-7.15                          | 7.06-7.13                          | 7.06-7.15              | 7.02-7.10          | 7.11              |
| 1,2-Dichloroethane (84°C)               | CH <sub>2</sub>                                                                                                     | s   | insoluble        | 3.90                               | 3.87                               | 3.81                   | 3.78               | 3.73              |
| Dichloromethane (40°C)                  | CH <sub>2</sub>                                                                                                     | s   | insoluble        | 5.76                               | 5.63                               | 5.44                   | 5.49               | 5.30              |
| Diethyl carbonate (127°C)               |  CH <sub>3</sub>                   | t   | 1.28             | 1.20                               | 1.24                               | 1.24                   | 1.26               | 1.31              |
|                                         | CH <sub>2</sub>                                                                                                     | q   | 4.21             | 4.10                               | 4.13                               | 4.12                   | 4.14               | 4.19              |
| Diethyl ether (35°C)                    | CH <sub>3</sub>                                                                                                     | t   | 1.17             | 1.09                               | 1.11                               | 1.12                   | 1.18               | 1.21              |
|                                         | CH <sub>2</sub>                                                                                                     | q   | 3.56             | 3.38                               | 3.41                               | 3.42                   | 3.49               | 3.48              |
| Diethyl succinate (218°C)               |  CH <sub>3</sub>                   | t   | 1.26             | 1.17                               | 1.21                               | 1.21                   | 1.24               | 1.26              |
|                                         | CH <sub>2</sub> O                                                                                                   | s   | 2.69             | 2.53                               | 2.57                               | 2.54                   | 2.59               | 2.62              |
|                                         | CH <sub>2</sub> CH <sub>2</sub>                                                                                     | q   | 4.18             | 4.05                               | 4.09                               | 4.09                   | 4.12               | 4.15              |
| Diglyme (162°C)                         | OCH <sub>3</sub>                                                                                                    | s   | 3.37             | 3.24                               | 3.28                               | 3.29                   | 3.35               | 3.39              |
|                                         | CH <sub>2</sub>                                                                                                     | m   | 3.61             | 3.38                               | 3.47                               | 3.45                   | 3.58               | 3.57              |
|                                         | CH <sub>2</sub>                                                                                                     | m   | 3.67             | 3.51                               | 3.56                               | 3.53                   | 3.61               | 3.65              |
| 1,2-Dimethoxyethane (85°C)              | CH <sub>3</sub>                                                                                                     | s   | 3.37             | 3.24                               | 3.28                               | 3.28                   | 3.35               | 3.40              |
|                                         | CH <sub>2</sub>                                                                                                     | s   | 3.60             | 3.43                               | 3.46                               | 3.45                   | 3.52               | 3.55              |
| Dimethyl carbonate (90°C)               |  CH <sub>3</sub>                   | s   | 3.80             | 3.69                               | 3.72                               | 3.72                   | 3.74               | 3.79              |
| Dimethyl isosorbide <sup>d</sup> (94°C) |  CH <sub>3</sub>                   | s   | 3.42             | 3.26                               | 3.31                               | 3.31                   | 3.36               | 3.38              |
|                                         | CH <sub>3</sub>                                                                                                     | s   | 3.45             | 3.31                               | 3.37                               | 3.36                   | 3.42               | 3.47              |
|                                         | CH <sub>2</sub> C(OMe) <sup>c</sup>                                                                                 | m   | 3.53-3.58        | 3.37-3.42                          | 3.44-3.49                          | 3.41-3.46              | 3.49-3.54          | 3.56-3.64         |
|                                         | CH <sub>2</sub> O <sup>c</sup>                                                                                      | m   | 3.86-3.91        | 3.69-3.75                          | 3.76-3.83                          | 3.76-3.80 <sup>f</sup> | 3.82-3.87          | 3.87*             |
|                                         | CH <sub>2</sub> C(OMe) <sup>c</sup> + CH(OMe)                                                                       | m   | 4.00-4.09        | 3.76-3.81                          | 3.76-3.83                          | 3.80-3.84 <sup>g</sup> | 3.87-3.89          | 3.90-4.02         |
|                                         | CH <sub>2</sub> O <sup>c</sup>                                                                                      |     |                  | 3.83                               | 3.86                               |                        | 3.91               | 4.52              |
|                                         | CH(OMe)                                                                                                             | m   | 4.13-4.19        | 3.84-3.89                          | 3.88-3.91                          | 3.84-3.91              | 3.93-3.99          | 4.62-4.67         |
|                                         | CH (junction)                                                                                                       | d   | 4.67             | 4.42                               | 4.43                               | 4.43                   | 4.49               | 3.90-4.02         |
|                                         | CH (junction)                                                                                                       | m   | 4.78             | 4.53-4.57                          | 4.57-4.61                          | 4.54-4.58              | 4.61-4.65          | 3.90-4.02         |
|                                         | CH (junction)                                                                                                       | m   | 4.78             | 4.53-4.57                          | 4.57-4.61                          | 4.54-4.58              | 4.61-4.65          | 3.90-4.02         |
| Dimethylacetamide (165°C)               | CH <sub>3</sub> CO                                                                                                  | s   | 2.08             | 1.96                               | 1.97                               | 1.97                   | 2.07               | 2.09              |
|                                         | NCH <sub>3</sub>                                                                                                    | s   | 2.90             | 2.78                               | 2.83                               | 2.83                   | 2.92               | 2.94              |
|                                         | NCH <sub>3</sub>                                                                                                    | s   | 3.06             | 2.94                               | 3.00                               | 2.96                   | 3.31               | 3.02              |
| Dimethylformamide (153°C)               | CH <sub>3</sub>                                                                                                     | s   | 2.86             | 2.73                               | 2.78                               | 2.77                   | 2.85               | 2.88              |
|                                         | CH <sub>3</sub>                                                                                                     | s   | 3.00             | 2.89                               | 2.94                               | 2.89                   | 3.01               | 2.96              |
|                                         | CH                                                                                                                  | s   | 7.91             | 7.95                               | 7.96                               | 7.92                   | 7.92               | 8.02              |
| Dimethyl sulfoxide (189°C)              |  CH <sub>3</sub>                 | s   | 2.71             | 2.54                               | 2.52                               | 2.50                   | 2.65               | 2.62              |
| Dimethylimidazolidinone (225°C)         |  CH <sub>3</sub>                 | s   | 2.74             | 2.63                               | 2.68                               | 2.67                   | 2.74               | 2.78              |
|                                         | CH <sub>2</sub>                                                                                                     | s   | 3.37             | 3.20                               | 3.23                               | 3.21                   | 3.31               | 3.27              |
| 1,4-Dioxane (102°C)                     | CH <sub>2</sub>                                                                                                     | s   | 3.75             | 3.57                               | 3.59                               | 3.60                   | 3.66               | 3.71              |
| 1,3-Dioxolane (75°C)                    |  OCH <sub>2</sub> O              | s   | 3.93             | 3.77                               | 3.80                               | 3.80                   | 3.83               | 3.88              |
|                                         | CH <sub>2</sub> CH <sub>2</sub>                                                                                     | s   | 4.90             | 4.78                               | 4.79                               | 4.80                   | 4.83               | 4.91              |
| Ethanol (78°C)                          |  CH <sub>3</sub>                 | t   | 1.17             | 1.06                               | 1.12                               | 1.12                   | 1.19               | 1.25              |
|                                         | CH <sub>2</sub>                                                                                                     | q   | 3.65             | 3.44                               | 3.57                               | 3.54                   | 3.60               | 3.72              |
|                                         | OH                                                                                                                  | s   | N/O              | 4.63                               | 3.39                               | 2.47                   | N/O                | 1.32              |
| Ethyl acetate (77°C)                    |  CH <sub>3</sub> CH <sub>2</sub> | t   | 1.24             | 1.17                               | 1.20                               | 1.20                   | 1.24               | 1.26              |
|                                         | CH <sub>3</sub> CO                                                                                                  | s   | 2.07             | 1.99                               | 1.97                               | 1.97                   | 2.01               | 2.05              |
|                                         | CH <sub>2</sub>                                                                                                     | q   | 4.14             | 4.03                               | 4.05                               | 4.06                   | 4.09               | 4.12              |
| Ethyl lactate <sup>b</sup> (154°C)      |  CH <sub>3</sub> CH <sub>2</sub> | t   | 1.28             | 1.19                               | 1.23                               | 1.24                   | 1.27               | 1.30              |
|                                         | CH <sub>3</sub> CH                                                                                                  | d   | 1.41             | 1.24                               | 1.32                               | 1.31                   | 1.36               | 1.42              |
|                                         | OH                                                                                                                  | d   | N/O              | 5.33                               | 4.07                               | 3.28                   | N/O                | 2.81              |
|                                         | CH <sub>2</sub>                                                                                                     | m   | 4.23*            | 4.04-4.16                          | 4.11-4.17                          | 4.09-4.22              | 4.18*              | 4.20-4.31         |
|                                         | CH                                                                                                                  | m   | 4.39*            | 4.04-4.16                          | 4.17-4.24                          | 4.09-4.22              | 4.21-4.25          | 4.20-4.31         |

# NMR Shifts for Residual Solvent Impurities (<sup>1</sup>H)

| Solvent (bp)                             |                                                                                     |                                    |    | D <sub>2</sub> O | (CD <sub>3</sub> ) <sub>2</sub> SO | (CD <sub>3</sub> ) <sub>2</sub> CO | CD <sub>3</sub> CN | CD <sub>3</sub> OD | CDCl <sub>3</sub> |
|------------------------------------------|-------------------------------------------------------------------------------------|------------------------------------|----|------------------|------------------------------------|------------------------------------|--------------------|--------------------|-------------------|
| Ethyl propionate <sup>b</sup> (99°C)     |    | CH <sub>3</sub> CH <sub>2</sub> CO | t  | 1.10             | 1.02                               | 1.07                               | 1.07               | 1.10               | 1.14              |
|                                          |                                                                                     | CH <sub>3</sub> CH <sub>2</sub> O  | t  | 1.26             | 1.18                               | 1.20                               | 1.20               | 1.24               | 1.26              |
|                                          |                                                                                     | CH <sub>2</sub> CO                 | q  | 2.39             | 2.29                               | 2.28                               | 2.28               | 2.31               | 2.32              |
|                                          |                                                                                     | CH <sub>2</sub> O                  | q  | 4.16             | 4.05                               | 4.07                               | 4.07               | 4.11               | 4.13              |
| Ethylene carbonate (248°C)               |    | CH <sub>2</sub>                    | s  | 4.62             | 4.48                               | 4.57                               | 4.45               | R                  | 4.53              |
| Ethylene glycol (197°C)                  |    | CH                                 | s  | 3.65             | 3.34                               | 3.28                               | 3.51               | 3.59               | 3.76              |
| Formic acid (101°C)                      |                                                                                     | H                                  | s  | 8.22             | 8.18                               | 8.11                               | 8.03               | 8.08               | 8.02              |
| Furfural <sup>b</sup> (162°C)            |    | CHCHO                              | dd | 6.77             | 6.79                               | 6.74                               | 6.67               | 6.70               | 6.61              |
|                                          |                                                                                     | CHC(CHO)                           | d  | 7.58             | 7.55                               | 7.43                               | 7.36               | 7.42               | 7.26              |
|                                          |                                                                                     | CHCHO                              | s  | 7.92*            | 8.11                               | 7.94                               | 7.81               | 7.88               | 7.70              |
|                                          |                                                                                     | C-CHO                              | s  | 9.50             | 9.62                               | 9.67                               | 9.60               | 9.60               | 9.67              |
| Glycerol (290°C) <sup>a</sup>            |    | CH <sub>2</sub>                    | m  | 3.52-3.59        | 3.25-3.31                          | 3.47-3.61                          | 3.39-3.46          | 3.48-3.54          | insoluble         |
|                                          |                                                                                     | CH <sub>2</sub>                    | m  | 3.62-3.68        | 3.33-3.39                          | 3.47-3.61                          | 3.46-3.53          | 3.55-3.61          | --                |
|                                          |                                                                                     | CH                                 | m  | 3.75-3.82        | 3.43                               | 3.47-3.61                          | 3.53-3.60          | 3.62-3.68          | --                |
|                                          |                                                                                     | OH(1)                              | t  | N/O              | 4.37                               | 3.47-3.61                          | 2.69               | N/O                | --                |
|                                          |                                                                                     | OH(2)                              | d  | N/O              | 4.44                               | 3.64                               | 2.93               | N/O                | --                |
| Glycerol diacetate (190°C)               |    | CH <sub>3</sub>                    | s  | 2.12             | 2.02                               | 2.01                               | 2.01               | R                  | 2.09              |
|                                          |                                                                                     | CH <sub>2</sub>                    | s  | 4.34             | 4.19                               | 4.24                               | 4.21               | --                 | 4.27              |
| Glycerol triacetate <sup>b</sup> (259°C) |    | CH <sub>3</sub>                    | s  | 2.12             | 2.02                               | 2.02                               | 2.01               | R                  | 2.08              |
|                                          |                                                                                     | CH <sub>3</sub>                    | s  | 2.14             | 2.03                               | 2.03                               | 2.02               | --                 | 2.09              |
|                                          |                                                                                     | CH <sub>2</sub>                    | dd | 4.31             | 4.13                               | 4.17                               | 4.14               | --                 | 4.16              |
|                                          |                                                                                     | CH <sub>2</sub>                    | dd | 4.37             | 4.22                               | 4.29                               | 4.22               | --                 | 4.30              |
|                                          |                                                                                     | CH                                 | tt | 5.32             | 5.15                               | 5.22                               | 5.19               | --                 | 5.22-5.28*        |
| <i>n</i> -Heptane (98°C)                 |    | CH <sub>3</sub>                    | t  | insoluble        | 0.86                               | 0.88                               | 0.89               | 0.90               | 0.89              |
|                                          |                                                                                     | CH <sub>2</sub>                    | m  | -                | 1.26                               | 1.21-1.35                          | 1.21-1.35          | 1.31               | 1.28              |
| <i>n</i> -Hexane (69°C)                  |                                                                                     | CH <sub>3</sub>                    | t  | insoluble        | 0.86                               | 0.88                               | 0.89               | 0.90               | 0.88              |
|                                          |                                                                                     | CH <sub>2</sub>                    | m  | -                | 1.25                               | 1.28                               | 1.28               | 1.29               | 1.26              |
| 1-Hexanol (156°C)                        |  | CH <sub>3</sub>                    | t  | 0.88             | 0.86                               | 0.88                               | 0.89               | 0.87-0.94          | 0.86-0.93         |
|                                          |                                                                                     | CH <sub>2</sub> (3-5)              | m  | 1.24-1.39        | 1.19-1.32                          | 1.24-1.39                          | 1.22-1.38          | 1.26-1.40          | 1.24-1.44         |
|                                          |                                                                                     | CH <sub>2</sub> (2)                | m  | 1.50-1.59        | 1.36-1.44                          | 1.45-1.55                          | 1.43-1.51          | 1.48-1.57          | 1.52-1.61         |
|                                          |                                                                                     | CH <sub>2</sub> (1)                | m  | 3.60             | 3.35-3.40                          | 3.37                               | 3.44-3.50          | 3.53               | 3.64              |
|                                          |                                                                                     | OH                                 | m  | N/O              | 4.31                               | 3.49-3.56                          | 2.43               | N/O                | 1.24-1.44         |
| Isoamyl acetate (142°C)                  |  | (CH <sub>3</sub> ) <sub>2</sub>    | d  | 0.91             | 0.88                               | 0.91                               | 0.91               | 0.93               | 0.92              |
|                                          |                                                                                     | CH <sub>2</sub> CH                 | m  | 1.55             | 1.46                               | 1.50                               | 1.49               | 1.52               | 1.52              |
|                                          |                                                                                     | CH                                 | m  | 1.69             | 1.64                               | 1.69                               | 1.69               | 1.67               | 1.64-1.74         |
|                                          |                                                                                     | CH <sub>3</sub> CO                 | s  | 2.09             | 1.99                               | 1.97                               | 1.97               | 2.01               | 2.04              |
|                                          |                                                                                     | CH <sub>2</sub> O                  | t  | 4.15             | 4.02                               | 4.06                               | 4.05               | 4.09               | 4.09              |
| Isoamyl alcohol (131°C)                  |  | CH <sub>3</sub>                    | d  | 0.90             | 0.85                               | 0.89                               | 0.89               | 0.91               | 0.92              |
|                                          |                                                                                     | CH <sub>2</sub> CH                 | m  | 1.44             | 1.31                               | 1.39                               | 1.37               | 1.42               | 1.47              |
|                                          |                                                                                     | CH                                 | m  | 1.61-1.71        | 1.65                               | 1.72                               | 1.67               | 1.64-1.77          | 1.66-1.78         |
|                                          |                                                                                     | CH <sub>2</sub> OH                 | td | 3.64*            | 3.41                               | 3.53-3.59*                         | 3.51               | 3.58*              | 3.68              |
|                                          |                                                                                     | OH                                 | t  | N/O              | 4.27                               | 3.32                               | 2.40               | N/O                | 1.26              |
| Isobutanol (108°C)                       |  | CH <sub>3</sub>                    | d  | 0.88             | 0.82                               | 0.87                               | 0.86               | 0.90               | 0.92              |
|                                          |                                                                                     | CH                                 | m  | 1.70-1.80        | 1.60                               | 1.68                               | 1.66               | 1.70               | 1.77              |
|                                          |                                                                                     | CH <sub>2</sub>                    | m  | 3.38             | 3.11-3.19                          | 3.26-3.34                          | 3.25               | 3.30               | 3.41              |
|                                          |                                                                                     | OH                                 | t  | N/O              | 4.39                               | 3.45                               | 2.52               | N/O                | 1.31              |
| Isooctane <sup>b</sup> (99°C)            |  | (CH <sub>3</sub> ) <sub>3</sub> C  | s  | insoluble        | 0.88                               | 0.90                               | 0.90               | 0.90               | 0.90              |
|                                          |                                                                                     | (CH <sub>3</sub> ) <sub>2</sub> CH | d  | -                | 0.90                               | 0.91                               | 0.91               | 0.92               | 0.91              |
|                                          |                                                                                     | CH <sub>2</sub>                    | d  | -                | 1.11                               | 1.14                               | 1.14               | 1.14               | 1.12              |
|                                          |                                                                                     | CH                                 | m  | -                | 1.59-1.70                          | 1.68                               | 1.68               | 1.63-1.73          | 1.60-1.71         |
| Isopropyl acetate (89°C)                 |  | (CH <sub>3</sub> ) <sub>2</sub> CH | d  | 1.25             | 1.17                               | 1.19                               | 1.19               | 1.22               | 1.23              |
|                                          |                                                                                     | CH <sub>3</sub> CO                 | s  | 2.07             | 1.96                               | 1.94                               | 1.94               | 1.99               | 2.02              |
|                                          |                                                                                     | CH                                 | m  | 4.98             | 4.86                               | 4.91                               | 4.91               | 4.95               | 4.99              |

# NMR Shifts for Residual Solvent Impurities (<sup>1</sup>H)

| Solvent (bp)                                |                                                                                     |                                       |       | D <sub>2</sub> O | (CD <sub>3</sub> ) <sub>2</sub> SO | (CD <sub>3</sub> ) <sub>2</sub> CO | CD <sub>3</sub> CN | CD <sub>3</sub> OD | CDCl <sub>3</sub> |
|---------------------------------------------|-------------------------------------------------------------------------------------|---------------------------------------|-------|------------------|------------------------------------|------------------------------------|--------------------|--------------------|-------------------|
| (R)-(+)-Limonene <sup>b</sup> (176°C)       |    | CH <sub>2</sub> CH <sub>2</sub> C=    | m     | insoluble        | 1.34-1.45                          | 1.40-1.51                          | 1.40-1.50          | 1.42-1.53          | 1.42-1.52         |
|                                             |                                                                                     | CH <sub>3</sub> C=CH                  | s     | -                | 1.61                               | 1.62                               | 1.63               | 1.63               | 1.65              |
|                                             |                                                                                     | CH <sub>3</sub> C=CH <sub>2</sub>     | s     | -                | 1.70                               | 1.72                               | 1.73               | 1.72               | 1.73              |
|                                             |                                                                                     | CH <sub>2</sub> CH <sub>2</sub> C=    | m     | -                | 1.71-1.77                          | 1.78                               | 1.75-1.81          | 1.79               | 1.79              |
|                                             |                                                                                     | CH <sub>2</sub> CH=                   | m     | -                | 1.80-1.95                          | 1.83-1.99                          | 1.84-1.99          | 1.84-1.99          | 1.86-1.99         |
|                                             |                                                                                     | CH + CH <sub>2</sub> C(Me)            | m     | -                | 1.95-2.08                          | 1.99-2.13                          | 2.00-2.12          | 2.00-2.14          | 2.00-2.15         |
|                                             |                                                                                     | CH <sub>2</sub> =                     | s     | -                | 4.69                               | 4.69                               | 4.71               | 4.69               | 4.70              |
|                                             |                                                                                     | CH=                                   | br s  | -                | 5.37                               | 5.38                               | 5.39               | 5.38               | 5.40              |
| Methanesulfonic acid (167°C)                |    | CH <sub>3</sub>                       | s     | 2.80             | 5.70                               | 3.00                               | 2.98               | 2.98               | R                 |
| Methanol (65°C)                             |    | CH <sub>3</sub>                       | s     | 3.34             | 3.16                               | 3.31                               | 3.28               | 3.34               | 3.49              |
|                                             |                                                                                     | OH                                    | s     | N/O              | 4.01                               | 3.12                               | 2.16               | N/O                | 1.09              |
| Methyl acetate (57°C)                       |    | CH <sub>3</sub> CO                    | s     | 2.09             | 1.92                               | 1.98                               | 1.99               | 2.02               | 2.05              |
|                                             |                                                                                     | OCH <sub>3</sub>                      | s     | 3.68             | 3.61                               | 3.59                               | 3.60               | 3.64               | 3.67              |
| Methyl ethyl ketone (80°C)                  |    | CH <sub>3</sub> CH <sub>2</sub>       | t     | 1.26             | 0.91                               | 0.96                               | 0.96               | 1.01               | 1.06              |
|                                             |                                                                                     | CH <sub>3</sub> CO                    | s     | 2.19             | 2.07                               | 2.07                               | 2.06               | 2.12               | 2.14              |
|                                             |                                                                                     | CH <sub>2</sub> CH <sub>3</sub>       | q     | 3.18             | 2.43                               | 2.45                               | 2.43               | 2.50               | 2.46              |
| Methyl isobutyl ketone <sup>b</sup> (117°C) |    | (CH <sub>3</sub> ) <sub>2</sub> CH    | d     | 0.90             | 0.85                               | 0.88                               | 0.88               | 0.85               | 0.92              |
|                                             |                                                                                     | CH                                    | m     | 2.08             | 2.00                               | 2.02-2.11                          | 2.02-2.08          | 2.00               | 2.13              |
|                                             |                                                                                     | CH <sub>3</sub> CO                    | s     | 2.21             | 2.05                               | 2.06                               | 2.05               | 2.05               | 2.12              |
|                                             |                                                                                     | CH <sub>2</sub>                       | d     | 2.43             | 2.28                               | 2.31                               | 2.29               | 2.28               | 2.30              |
| Methylcyclohexane <sup>b</sup> (101°C)      |    | CH <sub>2</sub> CH <sup>c</sup> (ax.) | m     | insoluble        | 0.80-0.90                          | 0.87-0.93                          | 0.88-0.94          | 0.82-0.94          | 0.82-0.93         |
|                                             |                                                                                     | CH <sub>3</sub>                       | d     | -                | 0.84                               | 0.84                               | 0.86               | 0.87               | 0.86              |
|                                             |                                                                                     | CH <sub>2</sub> <sup>c</sup> (4)(ax.) | m     | -                | 1.04-1.14                          | 1.07-1.17                          | 1.08-1.18          | 1.09-1.20          | 1.06-1.17         |
|                                             |                                                                                     | CH <sub>2</sub> <sup>c</sup> (3)(ax.) | m     | -                | 1.14-1.25                          | 1.24                               | 1.25               | 1.26               | 1.17-1.28         |
|                                             |                                                                                     | CH                                    | m     | -                | 1.32                               | 1.34                               | 1.30-1.39          | 1.31-1.39          | 1.33              |
|                                             |                                                                                     | all equatorial H's                    | m     | -                | 1.56-1.67                          | 1.58-1.70                          | 1.58-1.71          | 1.60-1.73          | 1.58-1.72         |
| 2-Methyltetrahydrofuran <sup>b</sup> (78°C) |  | CH <sub>3</sub>                       | d     | 1.23             | 1.12                               | 1.14                               | 1.15               | 1.21               | 1.23              |
|                                             |                                                                                     | CH <sub>2</sub> CH(Me) <sup>c</sup>   | m     | 1.43-1.52        | 1.26-1.36                          | 1.30-1.39                          | 1.31-1.40          | 1.38-1.47          | 1.36-1.46         |
|                                             |                                                                                     | CH <sub>2</sub> CH <sub>2</sub> O     | m     | 1.86-2.01        | 1.73-1.88                          | 1.76-1.91                          | 1.77-1.91          | 1.84-1.99          | 1.80-1.95         |
|                                             |                                                                                     | CH <sub>2</sub> CH(Me) <sup>c</sup>   | m     | 2.02-2.11        | 1.89-1.97                          | 1.92-2.00                          | 1.92-2.00          | 1.99-2.07          | 1.95-2.03         |
|                                             |                                                                                     | CH <sub>2</sub> O <sup>c</sup>        | m     | 3.70-3.77        | 3.52-3.59                          | 3.55-3.63                          | 3.60               | 3.66-3.73          | 3.71              |
|                                             |                                                                                     | CH <sub>2</sub> O <sup>c</sup>        | m     | 3.84-3.91        | 3.71-3.78                          | 3.76-3.82                          | 3.79               | 3.82-3.90          | 3.86-3.92         |
|                                             |                                                                                     | CH                                    | m     | 3.99-4.07        | 3.79-3.87                          | 3.82-3.88                          | 3.82-3.89          | 3.90-3.99          | 3.92-3.98         |
| Nitromethane (101°C)                        |                                                                                     | CH <sub>3</sub>                       | s     | 4.40             | 4.42                               | 4.43                               | 4.31               | 4.34               | 4.33              |
| 1-Octanol (196°C)                           |  | CH <sub>3</sub>                       | t     | 0.83-0.90*       | 0.86                               | 0.88                               | 0.89               | 0.90               | 0.88              |
|                                             |                                                                                     | CH <sub>2</sub> (3-7)                 | m     | 1.23-1.38        | 1.19-1.32                          | 1.23-1.39                          | 1.22-1.36          | 1.23-1.40          | 1.22-1.39         |
|                                             |                                                                                     | CH <sub>2</sub> (2)                   | m     | 1.51-1.59        | 1.36-1.44                          | 1.46-1.53                          | 1.42-1.51          | 1.48-1.56          | 1.57              |
|                                             |                                                                                     | CH <sub>2</sub> (1)                   | m     | 3.60*            | 3.35-3.40                          | 3.48-3.55                          | 3.43-3.50          | 3.53*              | 3.60-3.68         |
|                                             |                                                                                     | OH                                    | t     | N/O              | 4.31                               | 3.37                               | 2.45               | N/O                | 1.22-1.39         |
| <i>n</i> -Pentane (36°C)                    |                                                                                     | CH <sub>3</sub>                       | t     | insoluble        | 0.86                               | 0.88                               | 0.89               | 0.90               | 0.88              |
|                                             |                                                                                     | CH <sub>2</sub>                       | m     | -                | 1.27                               | 1.27                               | 1.29               | 1.29               | 1.27              |
| 1-Pentanol (137°C)                          |  | CH <sub>3</sub>                       | t     | 0.89             | 0.86                               | 0.89                               | 0.90               | 0.92               | 0.91              |
|                                             |                                                                                     | CH <sub>2</sub> (3/4)                 | m     | 1.26-1.39        | 1.21-1.33                          | 1.27-1.37                          | 1.25-1.38          | 1.28-1.40          | 1.29-1.40         |
|                                             |                                                                                     | CH <sub>2</sub> (2)                   | m     | 1.50-1.62        | 1.37-1.45                          | 1.45-1.55                          | 1.43-1.52          | 1.48-1.57          | 1.52-1.62         |
|                                             |                                                                                     | CH <sub>2</sub> (1)                   | t     | 3.60             | 3.37                               | 3.37                               | 2.46               | 3.53               |                   |
| 1,2-Propanediol (187°C)                     |  | OH                                    | t     | N/O              | 4.31*                              | 3.48-3.55                          | 3.44-3.51          | N/O                | 3.64              |
|                                             |                                                                                     | CH <sub>3</sub>                       | d     | 1.14             | 1.00                               | 1.07                               | 1.04               | 1.12               | 1.16              |
|                                             |                                                                                     | OH                                    | t     | N/O              | 4.44                               | 3.57                               | 2.75               | N/O                | 2.75-2.96 *       |
|                                             |                                                                                     | OH                                    | d     | N/O              | 4.38                               | 3.54                               | 2.81               | N/O                | 2.75-2.96*        |
|                                             |                                                                                     | CH <sub>2</sub>                       | m     | 3.41-3.47        | 3.12-3.19                          | 3.30-3.37                          | 3.21-3.30          | 3.40*              | 3.34-3.43         |
|                                             |                                                                                     | CH <sub>2</sub>                       | m     | 3.51-3.58        | 3.26*                              | 3.37-3.44                          | 3.34-3.42          | 3.41*              | 3.57-3.67         |
| 1,3-Propanediol (214°C)                     |  | CH                                    | m     | 3.84-3.92        | 3.52-3.60                          | 3.69-3.79                          | 3.64-3.74          | 3.75               | 3.84-3.95         |
|                                             |                                                                                     | CH <sub>2</sub> (2)                   | quint | 1.80             | 1.56                               | 1.70                               | 1.66               | 1.74               | 1.83*             |
|                                             |                                                                                     | CH <sub>2</sub> (1/3)                 | t     | 3.96             | 4.30                               | 3.54                               | 2.73               | 3.65               | 2.11*             |
|                                             |                                                                                     | OH                                    | m     | N/O              | 3.39-3.51                          | 3.62-3.70                          | 3.55-3.65          | N/O                | 3.81-3.91         |



# NMR Shifts for Residual Solvent Impurities (<sup>1</sup>H)

| Solvent (bp)                         |                                                                                     |                                     |      | D <sub>2</sub> O | (CD <sub>3</sub> ) <sub>2</sub> SO | (CD <sub>3</sub> ) <sub>2</sub> CO | CD <sub>3</sub> CN | CD <sub>3</sub> OD | CDCl <sub>3</sub> |
|--------------------------------------|-------------------------------------------------------------------------------------|-------------------------------------|------|------------------|------------------------------------|------------------------------------|--------------------|--------------------|-------------------|
| 1-Propanol (97°C)                    |    | CH <sub>3</sub>                     | t    | 0.90             | 0.83                               | 0.89                               | 0.88               | 0.92               | 0.94              |
|                                      |                                                                                     | CH <sub>2</sub> (2)                 | m    | 1.49-1.62        | 1.36-1.46                          | 1.44-1.55                          | 1.43-1.52          | 1.49-1.60          | 1.56*             |
|                                      |                                                                                     | CH <sub>2</sub> (1)                 | m    | 3.56*            | 3.33-3.37                          | 3.44-3.51                          | 3.40-3.47          | 3.5*               | 3.55-3.67         |
|                                      |                                                                                     | OH                                  | t    | N/O              | 4.34                               | 3.39                               | 2.47               | N/O                | 1.42*             |
| 2-Propanol (82°C)                    |    | CH <sub>3</sub>                     | d    | 1.18             | 1.04                               | 1.10                               | 1.09               | 1.15               | 1.21              |
|                                      |                                                                                     | CH                                  | m    | 4.05             | 3.77                               | 3.85-3.95                          | 3.81-3.92          | 3.92               | 4.03              |
|                                      |                                                                                     | OH                                  | d    | N/O              | 4.34                               | 3.37                               | 2.51               | N/O                | 1.38              |
| Propionic Acid (141°C)               |    | CH <sub>3</sub>                     | t    | 1.07             | 0.99                               | 1.07                               | 1.06               | 1.10               | 1.16              |
|                                      |                                                                                     | CH <sub>2</sub>                     | q    | 2.32             | 2.21                               | 2.29                               | 2.29               | 2.30               | 2.39              |
|                                      |                                                                                     | OH                                  | br s | N/O              | 11.95                              | N/O                                | 8.85               | N/O                | N/O               |
| n-Propyl acetate (102°C)             |    | CH <sub>3</sub> CH <sub>2</sub>     | t    | 0.92             | 0.88                               | 0.92                               | 0.92               | 0.94               | 0.94              |
|                                      |                                                                                     | CH <sub>2</sub> CH <sub>3</sub>     | m    | 1.65             | 1.57                               | 1.61                               | 1.61               | 1.64               | 1.65              |
|                                      |                                                                                     | CH <sub>3</sub> CO                  | s    | 2.09             | 2.00                               | 1.98                               | 1.98               | 2.02               | 2.05              |
|                                      |                                                                                     | CH <sub>2</sub> CO                  | t    | 4.06             | 3.95                               | 3.97                               | 3.97               | 4.01               | 4.02              |
| Propylene carbonate (242°C)          |    | CH <sub>3</sub>                     | d    | 1.48             | 1.37                               | 1.45                               | 1.40               | R                  | 1.50              |
|                                      |                                                                                     | CH <sub>2</sub>                     | m    | 4.20*            | 4.03-4.10                          | 4.05-4.13                          | 3.95-4.07          | --                 | 4.03*             |
|                                      |                                                                                     | CH <sub>2</sub>                     | m    | 4.66-4.73        | 4.52-4.59                          | 4.58-4.67                          | 4.48-4.58          | --                 | 4.52-4.59         |
|                                      |                                                                                     | CH                                  | m    | 4.99-5.08        | 4.84-4.95                          | 4.86-5.00                          | 4.80-4.90          | --                 | 4.81-4.90         |
| Pyridine (115°C)                     |                                                                                     | CH(2)                               | m    | 8.52             | 8.58                               | 8.58                               | 8.57               | 8.53               | 8.62              |
|                                      |                                                                                     | CH(3)                               | m    | 7.45             | 7.39                               | 7.35                               | 7.33               | 7.44               | 7.29              |
|                                      |                                                                                     | CH(4)                               | m    | 7.87             | 7.79                               | 7.76                               | 7.73               | 7.85               | 7.68              |
| Tetrahydrofuran (65°C)               |                                                                                     | CH <sub>2</sub>                     | m    | 1.88             | 1.76                               | 1.79                               | 1.80               | 1.87               | 1.85              |
|                                      |                                                                                     | CH <sub>2</sub> O                   | m    | 3.74             | 3.60                               | 3.63                               | 3.64               | 3.71               | 3.76              |
| Toluene (111°C)                      |    | CH <sub>3</sub>                     | s    | insoluble        | 2.30                               | 2.32                               | 2.33               | 2.32               | 2.36              |
|                                      |                                                                                     | CH( <i>o/p</i> )                    | m    | -                | 7.18                               | 7.1-7.2                            | 7.1-7.3            | 7.16               | 7.17              |
|                                      |                                                                                     | CH( <i>m</i> )                      | m    | -                | 7.25                               | 7.1-7.2                            | 7.1-7.3            | 7.16               | 7.25              |
| Triethylamine (89°C)                 |                                                                                     | CH <sub>3</sub>                     | t    | 1.07             | 0.99                               | 1.10                               | 1.07               | 1.06               | 1.16              |
|                                      |                                                                                     | CH <sub>2</sub>                     | q    | 2.32             | 2.21                               | 2.30                               | 2.29               | 2.29               | 2.39              |
|                                      |                                                                                     | OH                                  | br s | N/O              | 11.95                              | N/O                                | N/O                | 8.85               | N/O               |
| Water (100°C)                        |  | H <sub>2</sub> O                    | s    | --               | 3.33                               | 2.84                               | 2.13               | 4.87               | 1.56              |
| γ-Valerolactone <sup>b</sup> (207°C) |  | CH <sub>3</sub>                     | d    | 1.41             | 1.30                               | 1.34                               | 1.34               | R                  | 1.42              |
|                                      |                                                                                     | CH <sub>2</sub> CH(Me) <sup>c</sup> | m    | 1.91             | 1.74                               | 1.82                               | 1.78               | --                 | 1.83              |
|                                      |                                                                                     | CH <sub>2</sub> CH(Me) <sup>c</sup> | m    | 2.37-2.47        | 2.23-2.32                          | 2.33-2.41                          | 2.26-2.37          | --                 | 2.36              |
|                                      |                                                                                     | CH <sub>2</sub> C=O                 | m    | 2.58-2.73        | 2.43-2.58                          | 2.42-2.56                          | 2.40-2.54          | --                 | 2.49-2.61         |
|                                      |                                                                                     | CH                                  | m    | 4.83             | 4.55-4.66                          | 4.57-4.66                          | 4.55-4.66          | --                 | 4.60-4.69         |
|                                      |                                                                                     | CH                                  | m    | 4.83             | 4.55-4.66                          | 4.57-4.66                          | 4.55-4.66          | --                 | 4.60-4.69         |
| p-Xylene (138°C)                     |  | CH <sub>3</sub>                     | s    | 2.30             | 2.24                               | 2.26                               | 2.27               | 2.26               | 2.30              |
|                                      |                                                                                     | CH                                  | s    | 7.18             | 7.05                               | 7.04                               | 7.06               | 7.02               | 7.06              |

### Section 3:

NMR Shifts for Residual Solvent Impurities (<sup>13</sup>C)

| Solvent (bp)                        |                                                                                     |                                   | D <sub>2</sub> O | (CD <sub>3</sub> ) <sub>2</sub> SO | (CD <sub>3</sub> ) <sub>2</sub> CO | CD <sub>3</sub> CN | CD <sub>3</sub> OD | CDCl <sub>3</sub> |
|-------------------------------------|-------------------------------------------------------------------------------------|-----------------------------------|------------------|------------------------------------|------------------------------------|--------------------|--------------------|-------------------|
| Acetic acid (118°C)                 |    | CH <sub>3</sub>                   | 21.03            | 20.95                              | 20.51                              | 20.73              | 20.56              | 20.81             |
|                                     |                                                                                     | CO                                | 177.21           | 171.93                             | 172.31                             | 173.21             | 175.11             | 175.99            |
| Acetone (56°C)                      |    | CH <sub>3</sub>                   | 30.89            | 30.56                              | 30.60                              | 30.91              | 30.67              | 30.92             |
|                                     |                                                                                     | CO                                | 215.94           | 206.31                             | 205.87                             | 207.43             | 209.67             | 207.07            |
| Acetonitrile (82°C)                 |    | CH <sub>3</sub>                   | 1.47             | 1.03                               | 1.12                               | 1.79               | 0.85               | 1.89              |
|                                     |                                                                                     | CN                                | 119.68           | 117.91                             | 117.60                             | 118.26             | 118.06             | 116.43            |
| <i>t</i> -Amyl alcohol (102°C)      |    | CH <sub>3</sub> CH <sub>2</sub>   | 10.72            | 8.53                               | 8.90                               | 8.97               | 8.95               | 8.60              |
|                                     |                                                                                     | (CH <sub>3</sub> ) <sub>2</sub>   | 30.01            | 28.65                              | 29.13                              | 29.04              | 28.64              | 28.69             |
|                                     |                                                                                     | CH <sub>2</sub>                   | 38.09            | 35.84                              | 37.06                              | 37.08              | 37.12              | 36.38             |
|                                     |                                                                                     | C                                 | 74.93            | 68.76                              | 70.16                              | 70.85              | 71.63              | 71.20             |
| <i>t</i> -Amyl methyl ether (85°C)  |    | CH <sub>3</sub> CH <sub>2</sub>   | 10.40            | 7.99                               | 8.40                               | 8.55               | 8.47               | 8.22              |
|                                     |                                                                                     | (CH <sub>3</sub> ) <sub>2</sub> C | 26.49            | 24.18                              | 24.73                              | 24.83              | 24.83              | 24.49             |
|                                     |                                                                                     | CH <sub>2</sub>                   | 33.91            | 31.57                              | 32.88                              | 32.88              | 32.97              | 32.10             |
|                                     |                                                                                     | CH <sub>3</sub> O                 | 51.17            | 48.26                              | 48.95                              | 49.17              | 49.33              | 49.04             |
|                                     |                                                                                     | C                                 | 80.06            | 73.82                              | 74.72                              | 75.18              | 76.50              | 74.79             |
| Anisole (154°C)                     |    | CH <sub>3</sub>                   | 58.12            | 54.80                              | 55.34                              | 55.78              | 55.55              | 55.13             |
|                                     |                                                                                     | C( <i>i</i> )                     | 116.94           | 113.75                             | 114.66                             | 114.85             | 114.89             | 113.89            |
|                                     |                                                                                     | CH( <i>o</i> )                    | 124.19           | 120.33                             | 121.25                             | 121.53             | 121.59             | 120.65            |
|                                     |                                                                                     | CH( <i>m</i> )                    | 132.70           | 129.34                             | 130.22                             | 130.50             | 130.42             | 129.43            |
|                                     |                                                                                     | CH( <i>p</i> )                    | 189.21           | 159.11                             | 160.68                             | 160.74             | 161.16             | 159.55            |
| 1-Butanol (118°C)                   |    | CH <sub>3</sub>                   | 15.91            | 13.75                              | 14.21                              | 14.26              | 14.24              | 13.86             |
|                                     |                                                                                     | CH <sub>2</sub> (3)               | 21.22            | 18.54                              | 19.73                              | 19.81              | 20.03              | 18.90             |
|                                     |                                                                                     | CH <sub>2</sub> (2)               | 36.29            | 34.59                              | 35.93                              | 35.81              | 35.81              | 34.89             |
|                                     |                                                                                     | CH <sub>2</sub> (1)               | 64.41            | 60.27                              | 62.13                              | 62.35              | 62.69              | 62.76             |
| 2-Butanol (100°C)                   |  | CH <sub>3</sub> CH <sub>2</sub>   | 12.03            | 9.96                               | 10.41                              | 10.46              | 10.40              | 9.96              |
|                                     |                                                                                     | CH <sub>3</sub> CH                | 24.20            | 22.98                              | 23.50                              | 23.38              | 22.95              | 22.94             |
|                                     |                                                                                     | CH <sub>2</sub>                   | 33.65            | 31.60                              | 32.87                              | 32.85              | 32.83              | 32.07             |
|                                     |                                                                                     | CH                                | 72.24            | 67.03                              | 68.92                              | 69.32              | 70.00              | 69.52             |
| <i>t</i> -Butanol (82°C)            |  | CH <sub>3</sub>                   | 30.29            | 30.38                              | 30.72                              | 30.68              | 30.91              | 31.25             |
|                                     |                                                                                     | C                                 | 70.36            | 66.88                              | 68.13                              | 68.74              | 69.40              | 69.15             |
| <i>n</i> -Butyl acetate (126°C)     |  | CH <sub>3</sub> CH <sub>2</sub>   | 15.78            | 13.44                              | 13.95                              | 14.04              | 14.05              | 13.71             |
|                                     |                                                                                     | CH <sub>2</sub>                   | 21.33            | 18.51                              | 19.76                              | 19.88              | 20.19              | 19.14             |
|                                     |                                                                                     | CH <sub>3</sub> CO                | 23.32            | 20.62                              | 20.78                              | 21.15              | 20.84              | 21.01             |
|                                     |                                                                                     | CH <sub>2</sub>                   | 32.70            | 30.07                              | 31.48                              | 31.51              | 31.84              | 30.67             |
|                                     |                                                                                     | CH <sub>2</sub>                   | 68.38            | 63.39                              | 64.43                              | 64.87              | 65.46              | 64.37             |
|                                     |                                                                                     | CO                                | 177.72           | 170.3                              | 170.95                             | 171.78             | 173.09             | 171.25            |
| <i>t</i> -Butyl acetate (95°C)      |  | CH <sub>3</sub> CO                | 24.90            | 22.10                              | 22.32                              | 22.67              | 22.41              | 22.54             |
|                                     |                                                                                     | (CH <sub>3</sub> ) <sub>3</sub> C | 30.06            | 27.65                              | 28.21                              | 28.30              | 28.33              | 28.09             |
|                                     |                                                                                     | C                                 | 85.33            | 79.37                              | 80.06                              | 80.59              | 81.54              | 80.16             |
|                                     |                                                                                     | CO                                | 176.88           | 169.62                             | 170.39                             | 171.16             | 172.56             | 170.56            |
| <i>t</i> -Butyl methyl ether (55°C) |                                                                                     | CCH <sub>3</sub>                  | 26.60            | 26.79                              | 27.24                              | 27.28              | 27.22              | 26.99             |
|                                     |                                                                                     | OCH <sub>3</sub>                  | 49.37            | 48.70                              | 49.35                              | 49.52              | 49.66              | 49.45             |
|                                     |                                                                                     | C                                 | 75.62            | 72.04                              | 72.81                              | 73.17              | 74.32              | 72.87             |
| <i>t</i> -Butyl ethyl ether (72°C)  |  | CH <sub>3</sub> CH <sub>2</sub>   | 17.83            | 16.09                              | 16.65                              | 16.73              | 16.47              | 16.33             |
|                                     |                                                                                     | (CH <sub>3</sub> ) <sub>3</sub>   | 29.35            | 27.30                              | 27.85                              | 27.90              | 27.86              | 27.62             |
|                                     |                                                                                     | CH <sub>2</sub>                   | 60.19            | 55.91                              | 57.06                              | 57.35              | 58.03              | 56.77             |
|                                     |                                                                                     | C(CH <sub>3</sub> ) <sub>3</sub>  | 77.68            | 71.80                              | 72.58                              | 72.98              | 74.26              | 72.57             |
| Butylene carbonate (250°C)          |  | CH <sub>3</sub>                   | 10.42            | 8.23                               | 8.79                               | 8.85               | R                  | 8.52              |
|                                     |                                                                                     | CH <sub>2</sub> O                 | 28.83            | 25.86                              | 27.35                              | 27.37              | --                 | 26.99             |
|                                     |                                                                                     | CH <sub>2</sub> CH <sub>3</sub>   | 72.94            | 68.73                              | 69.76                              | 70.15              | --                 | 69.00             |
|                                     |                                                                                     | CH                                | 82.73            | 77.84                              | 78.83                              | 79.28              | --                 | 77.98             |
|                                     |                                                                                     | CO                                | 160.89           | 154.82                             | 155.69                             | 156.39             | --                 | 155.06            |
| Chloroform (61°C)                   |                                                                                     | CH                                | insoluble        | 79.16                              | 79.19                              | 79.17              | 79.44              | 77.36             |



# NMR Shifts for Residual Solvent Impurities (<sup>13</sup>C)

| Solvent (bp)                          |                                                                                     |                                    | D <sub>2</sub> O | (CD <sub>3</sub> ) <sub>2</sub> SO | (CD <sub>3</sub> ) <sub>2</sub> CO | CD <sub>3</sub> CN | CD <sub>3</sub> OD | CDCl <sub>3</sub> |
|---------------------------------------|-------------------------------------------------------------------------------------|------------------------------------|------------------|------------------------------------|------------------------------------|--------------------|--------------------|-------------------|
| 2,4,6-Collidine (171°C)               |    | CH <sub>3</sub> ( <i>p</i> )       | 22.84            | 20.16                              | 20.65                              | 20.82              | 20.83              | 20.78             |
|                                       |                                                                                     | CH <sub>3</sub> ( <i>o</i> )       | 25.20            | 23.69                              | 24.27                              | 24.36              | 23.49              | 24.29             |
|                                       |                                                                                     | CH                                 | 124.62           | 120.75                             | 121.51                             | 121.83             | 122.84             | 121.18            |
|                                       |                                                                                     | CCH <sub>3</sub> ( <i>p</i> )      | 152.95           | 146.84                             | 147.93                             | 148.59             | 150.47             | 147.44            |
|                                       |                                                                                     | CCH <sub>3</sub> ( <i>o</i> )      | 159.70           | 156.63                             | 158.04                             | 158.35             | 158.26             | 157.39            |
| Cyclohexane (81°C)                    |    | CH <sub>2</sub>                    | insoluble        | 26.33                              | 27.51                              | 27.63              | 27.96              | 26.94             |
| Cyclohexanone (155°C)                 |    | CH <sub>2</sub> (4)                | 26.98            | 24.22                              | 25.62                              | 25.67              | R                  | 25.02             |
|                                       |                                                                                     | CH <sub>2</sub> (3)                | 29.71            | 26.35                              | 27.71                              | 27.86              | --                 | 27.03             |
|                                       |                                                                                     | CH <sub>2</sub> (2)                | 44.24            | 41.23                              | 42.27                              | 42.50              | --                 | 42.00             |
|                                       |                                                                                     | CO                                 | 223.50           | 210.67                             | 210.27                             | 212.11             | --                 | 212.12            |
| Cyclopentyl methyl ether (106°C)      |    | CH <sub>2</sub> CH <sub>2</sub> O  | 25.87            | 23.04                              | 24.14                              | 24.29              | 24.45              | 23.55             |
|                                       |                                                                                     | CH <sub>2</sub> O                  | 34.13            | 31.33                              | 32.51                              | 32.64              | 32.85              | 31.97             |
|                                       |                                                                                     | CH <sub>3</sub>                    | 58.29            | 55.44                              | 56.18                              | 56.40              | 56.54              | 56.34             |
|                                       |                                                                                     | CH                                 | 86.68            | 81.89                              | 83.33                              | 83.61              | 84.48              | 82.98             |
| <i>p</i> -Cymene <sup>b</sup> (177°C) |    | CH <sub>3</sub> Ar                 | insoluble        | 20.47                              | 20.94                              | 21.00              | 21.04              | 20.96             |
|                                       |                                                                                     | (CH <sub>3</sub> ) <sub>2</sub> CH | --               | 23.89                              | 24.39                              | 24.42              | 24.56              | 24.11             |
|                                       |                                                                                     | CH(CH <sub>3</sub> ) <sub>2</sub>  | --               | 32.89                              | 34.36                              | 34.47              | 34.97              | 33.69             |
|                                       |                                                                                     | CH                                 | --               | 125.97                             | 126.94                             | 127.23             | 127.18             | 126.27            |
|                                       |                                                                                     | CH                                 | --               | 128.70                             | 129.66                             | 129.90             | 129.89             | 128.97            |
|                                       |                                                                                     | CCH                                | --               | 134.44                             | 135.64                             | 136.16             | 136.15             | 135.14            |
|                                       |                                                                                     | CCH <sub>3</sub>                   | --               | 145.19                             | 146.47                             | 146.90             | 146.98             | 145.88            |
| 1,2-Dichloroethane (84°C)             |                                                                                     | CH <sub>2</sub>                    | insoluble        | 45.02                              | 45.25                              | 45.54              | 45.11              | 43.50             |
| Dichloromethane (40°C)                |                                                                                     | CH <sub>2</sub>                    | insoluble        | 54.84                              | 54.95                              | 55.32              | 54.78              | 53.52             |
| Diethyl carbonate (127°C)             |    | CH <sub>3</sub>                    | 16.29            | 14.01                              | 14.55                              | 14.60              | 14.61              | 14.29             |
|                                       |                                                                                     | CH <sub>2</sub>                    | 67.71            | 63.19                              | 64.03                              | 64.50              | 64.76              | 63.78             |
|                                       |                                                                                     | CO                                 | 158.83           | 154.41                             | 155.86                             | 156.09             | 156.79             | 155.18            |
| Diethyl ether (35°C)                  |                                                                                     | CH <sub>3</sub>                    | 14.77            | 15.12                              | 15.78                              | 15.63              | 15.46              | 15.20             |
|                                       |                                                                                     | CH <sub>2</sub>                    | 66.42            | 62.05                              | 66.12                              | 66.32              | 66.88              | 65.91             |
| Diethyl succinate (218°C)             |  | CH <sub>3</sub>                    | 16.14            | 13.96                              | 14.49                              | 14.57              | 14.51              | 14.19             |
|                                       |                                                                                     | CH <sub>2</sub> CH <sub>2</sub>    | 31.96            | 28.53                              | 29.68                              | 29.88              | 30.03              | 29.22             |
|                                       |                                                                                     | CH <sub>2</sub> O                  | 64.80            | 59.89                              | 60.80                              | 61.29              | 61.75              | 60.68             |
|                                       |                                                                                     | CO                                 | 178.09           | 171.78                             | 172.65                             | 173.28             | 174.17             | 172.33            |
| Diglyme (162°C)                       |                                                                                     | CH <sub>3</sub>                    | 58.67            | 57.98                              | 58.77                              | 58.90              | 59.06              | 59.01             |
|                                       |                                                                                     | CH <sub>2</sub>                    | 70.05            | 69.54                              | 71.03                              | 70.99              | 71.33              | 70.51             |
|                                       |                                                                                     | CH <sub>2</sub>                    | 71.63            | 71.25                              | 72.63                              | 72.63              | 72.92              | 71.90             |
| 1,2-Dimethoxyethane (85°C)            |                                                                                     | CH <sub>3</sub>                    | 58.67            | 58.01                              | 58.45                              | 58.89              | 59.06              | 59.08             |
|                                       |                                                                                     | CH <sub>2</sub>                    | 71.49            | 71.07                              | 72.47                              | 72.47              | 72.72              | 71.84             |
| Dimethyl carbonate (90°C)             |  | CH <sub>3</sub>                    | 58.06            | 54.56                              | 54.96                              | 55.41              | 55.30              | 54.85             |
|                                       |                                                                                     | CO                                 | 160.04           | 155.63                             | 157.05                             | 157.29             | 157.99             | 156.40            |
| Dimethyl isosorbide (94°C)            |  | OCH <sub>3</sub>                   | 59.47            | 56.16                              | 56.90                              | 57.23              | 57.32              | 57.17             |
|                                       |                                                                                     | OCH <sub>3</sub>                   | 60.53            | 57.08                              | 57.86                              | 58.18              | 58.44              | 58.23             |
|                                       |                                                                                     | CH <sub>2</sub>                    | 72.05            | 69.19                              | 70.72                              | 70.62              | 71.00              | 69.77             |
|                                       |                                                                                     | CH <sub>2</sub>                    | 75.39            | 72.00                              | 73.27                              | 73.54              | 73.94              | 73.04             |
|                                       |                                                                                     | CH (junction)                      | 82.54            | 79.37                              | 80.87                              | 80.94              | 81.51              | 79.92             |
|                                       |                                                                                     | CH(OMe)                            | 83.71            | 80.92                              | 82.54                              | 82.61              | 83.00              | 81.80             |
|                                       |                                                                                     | CH (junction)                      | 87.70            | 85.03                              | 86.71                              | 86.68              | 87.03              | 85.91             |
| Dimethylacetamide (165°C)             |                                                                                     | CH(OMe)                            | 87.81            | 85.05                              | 86.81                              | 86.81              | 87.07              | 85.93             |
|                                       |                                                                                     | CH <sub>3</sub>                    | 21.09            | 21.29                              | 21.51                              | 21.76              | 21.32              | 21.53             |
|                                       |                                                                                     | NCH <sub>3</sub>                   | 35.03            | 37.38                              | 34.89                              | 35.17              | 35.50              | 35.28             |
|                                       |                                                                                     | NCH <sub>3</sub>                   | 38.76            | 34.42                              | 37.92                              | 38.26              | 38.43              | 38.13             |
| Dimethylformamide (153°C)             |                                                                                     | CO                                 | 174.57           | 169.54                             | 170.61                             | 171.31             | 173.32             | 171.07            |
|                                       |                                                                                     | CH <sub>3</sub>                    | 32.03            | 30.73                              | 31.03                              | 31.32              | 31.61              | 31.45             |
|                                       |                                                                                     | CH <sub>3</sub>                    | 37.54            | 35.73                              | 36.15                              | 36.57              | 36.89              | 36.50             |
|                                       |                                                                                     | CH                                 | 165.53           | 162.29                             | 162.79                             | 163.31             | 164.73             | 162.62            |
| Dimethyl sulfoxide (189°C)            |  | CH <sub>3</sub>                    | 39.39            | 40.45                              | 41.23                              | 41.31              | 40.45              | 40.76             |

# NMR Shifts for Residual Solvent Impurities (<sup>13</sup>C)

| Solvent (bp)                                                                                                         |                                    | D <sub>2</sub> O | (CD <sub>3</sub> ) <sub>2</sub> SO | (CD <sub>3</sub> ) <sub>2</sub> CO | CD <sub>3</sub> CN | CD <sub>3</sub> OD | CDCl <sub>3</sub> |
|----------------------------------------------------------------------------------------------------------------------|------------------------------------|------------------|------------------------------------|------------------------------------|--------------------|--------------------|-------------------|
| Dimethylimidazolidinone (225°C)     | CH <sub>3</sub>                    | 33.68            | 31.08                              | 31.65                              | 31.85              | 31.56              | 31.53             |
|                                                                                                                      | CH <sub>2</sub>                    | 47.88            | 44.37                              | 45.62                              | 45.81              | 46.13              | 45.09             |
|                                                                                                                      | CO                                 | 166.86           | 161.27                             | 162.37                             | 163.00             | 164.19             | 162.10            |
| 1,4-Dioxane (102°C)                                                                                                  | CH <sub>2</sub>                    | 67.19            | 66.36                              | 67.60                              | 67.72              | 68.11              | 67.14             |
| 1,3-Dioxolane (75°C)                | CH <sub>2</sub> CH <sub>2</sub>    | 67.09            | 63.74                              | 65.00                              | 65.21              | 65.51              | 64.58             |
|                                                                                                                      | OCH <sub>2</sub> O                 | 96.94            | 93.98                              | 95.34                              | 95.57              | 95.84              | 95.09             |
| Ethanol (78°C)                      | CH <sub>3</sub>                    | 17.47            | 18.51                              | 18.89                              | 18.80              | 18.40              | 18.41             |
|                                                                                                                      | CH <sub>2</sub>                    | 58.05            | 56.07                              | 57.72                              | 57.96              | 58.26              | 58.28             |
| Ethyl acetate (77°C)                | CH <sub>3</sub>                    | 13.92            | 14.40                              | 14.50                              | 14.54              | 14.49              | 14.19             |
|                                                                                                                      | CH <sub>3</sub> CO                 | 21.15            | 20.68                              | 20.83                              | 21.16              | 20.88              | 21.04             |
|                                                                                                                      | CH <sub>2</sub>                    | 62.32            | 59.74                              | 60.56                              | 60.98              | 61.50              | 60.49             |
|                                                                                                                      | CO                                 | 175.26           | 170.31                             | 170.96                             | 171.68             | 172.89             | 171.36            |
| Ethyl lactate <sup>b</sup> (154°C)  | CH <sub>3</sub> CH <sub>2</sub>    | 16.14            | 14.01                              | 14.48                              | 14.55              | 14.53              | 14.19             |
|                                                                                                                      | CH <sub>3</sub> CH                 | 22.01            | 20.28                              | 20.78                              | 20.80              | 20.59              | 20.42             |
|                                                                                                                      | CH <sub>2</sub>                    | 65.13            | 59.85                              | 61.16                              | 61.78              | 62.00              | 61.69             |
|                                                                                                                      | CH                                 | 69.61            | 65.82                              | 67.42                              | 67.61              | 67.91              | 66.76             |
|                                                                                                                      | CO                                 | 179.43           | 174.45                             | 175.57                             | 176.01             | 176.43             | 175.75            |
|                                                                                                                      | CH <sub>3</sub> CH <sub>2</sub> CO | 11.22            | 8.89                               | 9.38                               | 9.49               | 9.46               | 9.14              |
| Ethyl propionate (99°C)             | CH <sub>3</sub> CH <sub>2</sub> O  | 16.17            | 14.02                              | 14.54                              | 14.62              | 14.54              | 14.26             |
|                                                                                                                      | CH <sub>2</sub> CO                 | 30.32            | 26.71                              | 27.82                              | 28.12              | 28.38              | 27.64             |
|                                                                                                                      | CH <sub>2</sub> O                  | 64.45            | 59.57                              | 60.43                              | 60.90              | 61.44              | 60.24             |
|                                                                                                                      | CO                                 | 180.91           | 173.49                             | 174.29                             | 175.10             | 176.30             | 174.53            |
|                                                                                                                      | CH <sub>2</sub>                    | 68.88            | 64.89                              | 65.69                              | 66.04              | R                  | 64.59             |
| Ethylene carbonate (248°C)          | CO                                 | 161.38           | 155.44                             | 156.28                             | 156.98             | --                 | 155.41            |
| Ethylene glycol (197°C)            | CH <sub>2</sub>                    | 63.17            | 62.76                              | 64.26                              | 64.22              | 64.30              | 63.79             |
| Formic acid (101°C)               | CO <sub>2</sub> H                  | 165.19           | 162.98                             | 162.32                             | 162.72             | 164.42             | 165.02            |
| Furfural (162°C)                  | CHCHO                              | 116.12           | 112.81                             | 113.44                             | 113.66             | 113.81             | 112.58            |
|                                                                                                                      | CHC(CHO)                           | 153.05           | 122.90                             | 122.25                             | 123.06             | 123.27             | 120.93            |
|                                                                                                                      | CHCHO                              | 183.57           | 149.10                             | 149.33                             | 149.66             | 150.14             | 148.06            |
|                                                                                                                      | C                                  | 154.96           | 152.41                             | 154.21                             | 154.13             | 154.58             | 153.02            |
|                                                                                                                      | C-CHO                              | 218.56           | 178.31                             | 178.43                             | 179.07             | 179.69             | 177.88            |
| Glycerol (290°C)                  | CH <sub>2</sub>                    | 65.35            | 62.97                              | 64.57                              | 64.37              | 64.47              | insoluble         |
|                                                                                                                      | CH                                 | 74.92            | 72.37                              | 73.37                              | 73.29              | 73.91              | --                |
| Glycerol diacetate (190°C)        | CH <sub>3</sub>                    | 23.10            | 20.50                              | 20.65                              | 21.01              | R                  | 20.81             |
|                                                                                                                      | CH <sub>2</sub>                    | 65.68            | 61.81                              | 62.81                              | 63.06              | --                 | 62.19             |
|                                                                                                                      | CO                                 | 176.98           | 170.14                             | 170.87                             | 171.56             | --                 | 170.78            |
| Glycerol triacetate (259°C)       | CH <sub>3</sub> CO                 | 22.96            | 20.38                              | 20.55                              | 20.90              | R                  | 20.69             |
|                                                                                                                      | CH <sub>3</sub> CO                 | 23.18            | 20.57                              | 20.78                              | 21.11              | --                 | 20.89             |
|                                                                                                                      | CH <sub>2</sub>                    | 65.58            | 61.82                              | 62.85                              | 63.07              | --                 | 62.27             |
|                                                                                                                      | CH                                 | 72.60            | 68.73                              | 69.96                              | 70.00              | --                 | 69.08             |
|                                                                                                                      | CO                                 | 176.12           | 169.68                             | 170.43                             | 171.07             | --                 | 170.12            |
|                                                                                                                      | CO                                 | 176.67           | 169.98                             | 170.70                             | 171.40             | --                 | 170.51            |
| <i>n</i> -Heptane (98°C)          | CH <sub>3</sub>                    | insoluble        | 13.90                              | 14.33                              | 14.43              | 14.45              | 14.12             |
|                                                                                                                      | CH <sub>2</sub>                    | --               | 22.05                              | 23.32                              | 23.45              | 23.77              | 22.71             |
|                                                                                                                      | CH <sub>2</sub>                    | --               | 28.32                              | 29.74                              | 29.81              | 30.19              | 29.03             |
|                                                                                                                      | CH <sub>2</sub>                    | --               | 31.21                              | 32.60                              | 32.67              | 33.08              | 31.90             |
| <i>n</i> -Hexane (69°C)                                                                                              | CH <sub>3</sub>                    | insoluble        | 13.88                              | 14.34                              | 14.43              | 14.45              | 14.14             |
|                                                                                                                      | CH <sub>2</sub> (2)                | --               | 22.05                              | 23.28                              | 23.40              | 23.68              | 22.70             |
|                                                                                                                      | CH <sub>2</sub> (3)                | --               | 30.95                              | 32.30                              | 32.36              | 32.73              | 31.64             |
| 1-Hexanol (156°C)                 | CH <sub>3</sub>                    | 16.17            | 13.84                              | 14.32                              | 14.39              | 14.40              | 14.03             |
|                                                                                                                      | CH <sub>2</sub> (5)                | 24.80            | 22.06                              | 23.35                              | 23.45              | 23.74              | 22.65             |
|                                                                                                                      | CH <sub>2</sub> (4)                | 27.58            | 25.08                              | 26.37                              | 26.38              | 26.67              | 25.44             |
|                                                                                                                      | CH <sub>2</sub> (3)                | 33.69            | 31.11                              | 32.51                              | 32.51              | 32.90              | 31.66             |
|                                                                                                                      | CH <sub>2</sub> (2)                | 34.11            | 32.42                              | 33.77                              | 33.65              | 33.67              | 32.79             |
|                                                                                                                      | CH <sub>2</sub> (1)                | 64.76            | 60.63                              | 62.49                              | 62.68              | 63.05              | 63.09             |

# NMR Shifts for Residual Solvent Impurities (<sup>13</sup>C)

| Solvent (bp)                            |                                                                                     |                                    | D <sub>2</sub> O | (CD <sub>3</sub> ) <sub>2</sub> SO | (CD <sub>3</sub> ) <sub>2</sub> CO | CD <sub>3</sub> CN | CD <sub>3</sub> OD | CDCl <sub>3</sub> |
|-----------------------------------------|-------------------------------------------------------------------------------------|------------------------------------|------------------|------------------------------------|------------------------------------|--------------------|--------------------|-------------------|
| Isoamyl acetate (142°C)                 |    | CH <sub>3</sub> CH                 | 23.34            | 20.64                              | 20.80                              | 21.17              | 20.86              | 21.03             |
|                                         |                                                                                     | (CH <sub>3</sub> ) <sub>2</sub>    | 24.49            | 22.19                              | 22.70                              | 22.75              | 22.82              | 22.46             |
|                                         |                                                                                     | CH                                 | 27.24            | 24.41                              | 25.75                              | 25.89              | 26.27              | 25.08             |
|                                         |                                                                                     | CH <sub>2</sub> CH                 | 39.36            | 36.77                              | 38.16                              | 38.17              | 38.53              | 37.34             |
|                                         |                                                                                     | CH <sub>3</sub> O                  | 67.20            | 62.14                              | 63.19                              | 63.64              | 64.20              | 63.16             |
| Isoamyl alcohol (131°C)                 |    | C=O                                | N/O              | 170.27                             | 170.93                             | 171.75             | 173.05             | 171.23            |
|                                         |                                                                                     | CH <sub>3</sub>                    | 24.63            | 22.51                              | 22.98                              | 22.96              | 23.03              | 22.62             |
|                                         |                                                                                     | CH                                 | 26.87            | 24.13                              | 25.42                              | 25.55              | 25.86              | 24.72             |
|                                         |                                                                                     | CH <sub>2</sub> (2)                | 43.17            | 41.50                              | 42.80                              | 42.65              | 42.71              | 41.76             |
|                                         |                                                                                     | CH <sub>2</sub> (1)                | 63.03            | 58.86                              | 60.70                              | 60.93              | 61.27              | 61.37             |
| Isobutanol (108°C)                      |    | CH <sub>3</sub>                    | 21.05            | 19.01                              | 19.37                              | 19.32              | 19.40              | 18.86             |
|                                         |                                                                                     | CH                                 | 32.60            | 30.37                              | 31.74                              | 31.74              | 31.96              | 30.85             |
|                                         |                                                                                     | CH <sub>2</sub>                    | 71.50            | 67.64                              | 69.44                              | 69.52              | 69.95              | 69.81             |
| Isooctane <sup>b</sup> (99°C)           |    | CH                                 | insoluble        | 24.04                              | 25.28                              | 25.40              | 25.79              | 24.61             |
|                                         |                                                                                     | (CH <sub>3</sub> ) <sub>3</sub> C  | --               | 25.24                              | 25.77                              | 25.80              | 25.92              | 25.48             |
|                                         |                                                                                     | (CH <sub>3</sub> ) <sub>2</sub> CH | --               | 29.83                              | 30.35                              | 30.37              | 30.55              | 30.10             |
|                                         |                                                                                     | C                                  | --               | 30.69                              | 31.51                              | 31.59              | 31.84              | 31.05             |
|                                         |                                                                                     | CH <sub>2</sub>                    | --               | 52.55                              | 53.79                              | 53.84              | 54.34              | 53.09             |
| Isopropyl acetate (89°C)                |    | CH <sub>3</sub> CO                 | insoluble        | 21.06                              | 21.21                              | 21.57              | 21.25              | 21.44             |
|                                         |                                                                                     | (CH <sub>3</sub> ) <sub>2</sub> CH | --               | 21.56                              | 22.00                              | 22.07              | 22.00              | 21.84             |
|                                         |                                                                                     | CH                                 | --               | 66.93                              | 67.75                              | 68.26              | 69.07              | 67.64             |
|                                         |                                                                                     | CO                                 | --               | 169.78                             | 170.41                             | 171.21             | 172.54             | 170.66            |
| (R)-(+)-Limonene <sup>b</sup> (176°C)   |    | CH <sub>3</sub> C=CH <sub>2</sub>  | insoluble        | 20.55                              | 20.93                              | 21.03              | 21.00              | 20.83             |
|                                         |                                                                                     | CH <sub>3</sub> C=CH               | --               | 23.16                              | 23.60                              | 23.65              | 23.65              | 23.48             |
|                                         |                                                                                     | CH <sub>2</sub> CH <sub>2</sub> C= | --               | 27.25                              | 28.68                              | 28.84              | 29.19              | 27.94             |
|                                         |                                                                                     | CH <sub>2</sub> C=                 | --               | 29.91                              | 31.10                              | 31.18              | 31.54              | 30.61             |
|                                         |                                                                                     | CH <sub>2</sub> C=                 | --               | 30.05                              | 31.48                              | 31.59              | 31.92              | 30.83             |
|                                         |                                                                                     | CH                                 | --               | 40.27                              | 41.89                              | 41.98              | 42.52              | 41.11             |
|                                         |                                                                                     | CH <sub>2</sub> =                  | --               | 108.62                             | 108.90                             | 108.98             | 108.98             | 108.36            |
|                                         |                                                                                     | CH=                                | --               | 120.31                             | 121.32                             | 121.50             | 121.61             | 120.65            |
|                                         |                                                                                     | C                                  | --               | 132.96                             | 134.09                             | 134.58             | 134.57             | 133.76            |
|                                         |                                                                                     | C                                  | --               | 149.27                             | 150.72                             | 151.37             | 151.21             | 150.29            |
| Methanesulfonic acid (167°C)            |  | CH <sub>3</sub>                    | 41.42            | 39.52                              | 39.72                              | 39.98              | 39.47              | R                 |
| Methanol (65°C)                         |  | CH <sub>3</sub>                    | 49.50            | 48.59                              | 49.77                              | 49.90              | 49.86              | 50.41             |
| Methyl acetate (57°C)                   |  | CH <sub>3</sub> CO                 | 20.55            | 20.45                              | 20.47                              | 20.84              | 20.48              | 20.67             |
|                                         |                                                                                     | CH <sub>3</sub> O                  | 52.59            | 51.21                              | 51.54                              | 52.02              | 52.06              | 51.58             |
|                                         |                                                                                     | CO                                 | 175.54           | 170.80                             | 171.34                             | 172.16             | 173.36             | 171.51            |
| Methyl cyclohexane <sup>b</sup> (101°C) |  | CH <sub>3</sub>                    | insoluble        | 22.65                              | 23.17                              | 23.25              | 23.32              | 22.91             |
|                                         |                                                                                     | CH <sub>2</sub> (4)                | --               | 25.67                              | 26.94                              | 27.10              | 27.43              | 26.35             |
|                                         |                                                                                     | CH <sub>2</sub> (3)                | --               | 25.73                              | 27.07                              | 27.22              | 27.56              | 26.46             |
|                                         |                                                                                     | CH                                 | --               | 32.01                              | 33.45                              | 33.57              | 34.03              | 32.74             |
|                                         |                                                                                     | CH <sub>2</sub> (2)                | --               | 34.77                              | 36.09                              | 36.19              | 36.61              | 35.45             |
| Methyl ethyl ketone (80°C)              |  | CH <sub>3</sub> CH <sub>2</sub>    | 7.87             | 7.61                               | 8.03                               | 8.14               | 8.09               | 7.86              |
|                                         |                                                                                     | CH <sub>3</sub> CO                 | 29.49            | 29.26                              | 29.30                              | 29.60              | 29.39              | 29.49             |
|                                         |                                                                                     | CH <sub>2</sub> CH <sub>3</sub>    | 37.27            | 35.83                              | 36.75                              | 37.09              | 37.34              | 36.89             |
|                                         |                                                                                     | CO                                 | 218.43           | 208.72                             | 208.30                             | 209.88             | 212.16             | 209.56            |
| Methyl isobutyl ketone (117°C)          |  | (CH <sub>3</sub> ) <sub>2</sub>    | 19.62            | 22.28                              | 22.72                              | 22.76              | 22.80              | 22.53             |
|                                         |                                                                                     | CH                                 | 22.52            | 23.85                              | 25.03                              | 25.29              | 25.68              | 24.63             |
|                                         |                                                                                     | CH <sub>3</sub> CO                 | 27.62            | 30.03                              | 30.15                              | 30.44              | 30.26              | 30.34             |
|                                         |                                                                                     | CH <sub>2</sub>                    | 50.36            | 51.76                              | 52.78                              | 53.04              | 53.38              | 52.80             |
|                                         |                                                                                     | CO                                 | 215.72           | 208.16                             | 207.71                             | 209.44             | 211.81             | 208.97            |

# NMR Shifts for Residual Solvent Impurities (<sup>13</sup>C)

| Solvent (bp)                                                                                                         |                                 | D <sub>2</sub> O | (CD <sub>3</sub> ) <sub>2</sub> SO | (CD <sub>3</sub> ) <sub>2</sub> CO | CD <sub>3</sub> CN | CD <sub>3</sub> OD | CDCl <sub>3</sub> |
|----------------------------------------------------------------------------------------------------------------------|---------------------------------|------------------|------------------------------------|------------------------------------|--------------------|--------------------|-------------------|
| 2-Methyl tetrahydrofuran (78°C)     | CH <sub>3</sub>                 | 22.58            | 20.81                              | 21.26                              | 21.33              | 21.12              | 20.97             |
|                                                                                                                      | CH <sub>2</sub> (4)             | 28.03            | 25.32                              | 26.43                              | 26.58              | 26.76              | 25.91             |
|                                                                                                                      | CH <sub>2</sub> (3)             | 35.17            | 32.61                              | 33.75                              | 33.83              | 34.04              | 33.10             |
|                                                                                                                      | CH <sub>2</sub> (5)             | 70.39            | 66.64                              | 67.93                              | 68.10              | 68.68              | 67.73             |
|                                                                                                                      | CH                              | 79.09            | 74.20                              | 75.49                              | 75.78              | 76.75              | 75.23             |
| 1-Octanol (196°C)                   | CH <sub>3</sub>                 | insoluble        | 13.85                              | 14.35                              | 14.43              | 14.45              | 14.10             |
|                                                                                                                      | CH <sub>2</sub> (7)             | --               | 21.99                              | 23.32                              | 23.44              | 23.75              | 22.66             |
|                                                                                                                      | CH <sub>2</sub> (6)             | --               | 25.41                              | 26.71                              | 26.71              | 26.99              | 25.76             |
|                                                                                                                      | CH <sub>2</sub> (5)             | --               | 28.65                              | 30.10                              | 30.13              | 30.47              | 29.28             |
|                                                                                                                      | CH <sub>2</sub> (4)             | --               | 28.82                              | 30.25                              | 30.25              | 30.61              | 29.41             |
|                                                                                                                      | CH <sub>2</sub> (3)             | --               | 31.16                              | 32.61                              | 32.65              | 33.04              | 31.82             |
|                                                                                                                      | CH <sub>2</sub> (2)             | --               | 32.45                              | 33.81                              | 33.68              | 33.71              | 32.83             |
|                                                                                                                      | CH <sub>2</sub> (1)             | --               | 60.62                              | 62.49                              | 62.68              | 63.05              | 63.11             |
| Nitromethane (101°C)                                                                                                 | CH <sub>3</sub>                 | 63.22            | 63.28                              | 63.21                              | 63.66              | 63.08              | 62.50             |
| <i>n</i> -Pentane (36°C)                                                                                             | CH <sub>3</sub>                 | insoluble        | 13.28                              | 14.29                              | 14.37              | 14.39              | 14.08             |
|                                                                                                                      | CH <sub>2</sub> (2)             | --               | 21.70                              | 22.98                              | 23.08              | 23.38              | 22.38             |
|                                                                                                                      | CH <sub>2</sub> (3)             | --               | 33.48                              | 34.83                              | 34.89              | 35.30              | 34.16             |
| 1-Pentanol (137°C)                  | CH <sub>3</sub>                 | 16.16            | 13.91                              | 14.37                              | 14.43              | 14.42              | 14.04             |
|                                                                                                                      | CH <sub>2</sub> (4)             | 24.63            | 21.93                              | 23.23                              | 23.30              | 23.60              | 22.50             |
|                                                                                                                      | CH <sub>2</sub> (3)             | 30.17            | 27.64                              | 28.90                              | 28.91              | 29.21              | 27.93             |
|                                                                                                                      | CH <sub>2</sub> (2)             | 33.83            | 32.12                              | 33.48                              | 33.37              | 33.39              | 32.51             |
|                                                                                                                      | CH <sub>2</sub> (1)             | 64.73            | 60.61                              | 62.47                              | 62.65              | 63.02              | 63.07             |
| 1,2-Propanediol (187°C)             | CH <sub>3</sub>                 | 20.82            | 19.87                              | 19.76                              | 19.53              | 19.56              | 18.79             |
|                                                                                                                      | CH                              | 69.44            | 67.08                              | 68.64                              | 68.49              | 68.62              | 68.03             |
|                                                                                                                      | CH <sub>2</sub>                 | 70.77            | 67.14                              | 68.66                              | 68.75              | 69.25              | 68.34             |
| 1,3-Propanediol (214°C)            | CH <sub>2</sub> (2)             | 36.62            | 35.70                              | 36.40                              | 36.09              | 36.32              | 34.08             |
|                                                                                                                      | CH <sub>2</sub> (1/3)           | 61.47            | 57.87                              | 60.44                              | 60.56              | 60.06              | 62.22             |
| 1-Propanol (97°C)                 | CH <sub>3</sub>                 | 12.42            | 10.33                              | 10.66                              | 10.68              | 10.62              | 10.15             |
|                                                                                                                      | CH <sub>2</sub> (2)             | 27.45            | 25.53                              | 26.77                              | 26.74              | 26.71              | 25.91             |
|                                                                                                                      | CH <sub>2</sub> (1)             | 66.43            | 62.37                              | 64.19                              | 64.36              | 64.73              | 64.69             |
| 2-Propanol (82°C)                 | CH <sub>3</sub>                 | 26.56            | 25.38                              | 25.79                              | 25.67              | 25.29              | 25.38             |
|                                                                                                                      | CH                              | 67.11            | 61.91                              | 63.72                              | 64.15              | 64.78              | 64.44             |
| Propionic Acid (141°C)            | CH <sub>3</sub>                 | 11.90            | 8.99                               | 9.39                               | 9.39               | 9.53               | 8.83              |
|                                                                                                                      | CH <sub>2</sub>                 | 31.32            | 26.80                              | 27.37                              | 27.52              | 28.15              | 27.39             |
|                                                                                                                      | CO <sub>2</sub> H               | 184.54           | 175.07                             | 175.36                             | 176.19             | 178.35             | 180.69            |
| <i>n</i> -Propyl acetate (102°C)  | CH <sub>3</sub> CH <sub>2</sub> | 8.09             | 10.20                              | 10.59                              | 10.65              | 10.66              | 10.37             |
|                                                                                                                      | CH <sub>2</sub> O               | 19.00            | 20.66                              | 22.69                              | 22.79              | 20.81              | 21.00             |
|                                                                                                                      | CH <sub>3</sub> CO              | 19.83            | 21.46                              | 20.75                              | 21.13              | 23.04              | 21.97             |
|                                                                                                                      | CH <sub>2</sub> CH <sub>3</sub> | 65.82            | 65.23                              | 66.20                              | 66.60              | 67.23              | 66.10             |
|                                                                                                                      | CO                              | 173.44           | 170.37                             | 170.96                             | 171.78             | 173.10             | 171.26            |
| Propylene carbonate (242°C)       | CH <sub>3</sub>                 | 21.09            | 18.72                              | 19.36                              | 19.42              | R                  | 19.47             |
|                                                                                                                      | CH <sub>2</sub>                 | 74.54            | 70.37                              | 71.40                              | 71.76              | --                 | 70.64             |
|                                                                                                                      | CH                              | 78.46            | 73.66                              | 74.45                              | 74.94              | --                 | 73.49             |
| Pyridine (115°C)                                                                                                     | CO                              | 160.80           | 154.78                             | 155.66                             | 156.36             | --                 | 154.98            |
|                                                                                                                      | CH(3)                           | 125.12           | 123.84                             | 124.57                             | 127.76             | 125.53             | 123.75            |
|                                                                                                                      | CH(4)                           | 138.27           | 136.05                             | 136.56                             | 136.89             | 138.35             | 135.96            |
|                                                                                                                      | CH(2)                           | 149.18           | 149.58                             | 150.67                             | 150.76             | 150.07             | 149.90            |

# NMR Shifts for Residual Solvent Impurities (<sup>13</sup>C)

| Solvent (bp)                                                                                                           |                        | D <sub>2</sub> O | (CD <sub>3</sub> ) <sub>2</sub> SO | (CD <sub>3</sub> ) <sub>2</sub> CO | CD <sub>3</sub> CN | CD <sub>3</sub> OD | CDCl <sub>3</sub> |
|------------------------------------------------------------------------------------------------------------------------|------------------------|------------------|------------------------------------|------------------------------------|--------------------|--------------------|-------------------|
| Tetrahydrofuran (65°C)                                                                                                 | CH <sub>2</sub>        | 25.67            | 25.14                              | 26.15                              | 26.27              | 26.48              | 25.62             |
|                                                                                                                        | CH <sub>2</sub> O      | 68.68            | 67.03                              | 68.07                              | 68.33              | 68.83              | 67.97             |
| Toluene (111°C)                       | CH <sub>3</sub>        | insoluble        | 20.99                              | 21.46                              | 21.50              | 21.50              | 21.46             |
|                                                                                                                        | CH( <i>p</i> )         | --               | 125.29                             | 126.12                             | 126.28             | 126.29             | 125.33            |
|                                                                                                                        | CH( <i>m</i> )         | --               | 128.18                             | 129.03                             | 129.23             | 129.20             | 128.26            |
|                                                                                                                        | CH( <i>o</i> )         | --               | 128.88                             | 129.76                             | 129.94             | 129.91             | 129.07            |
|                                                                                                                        | C( <i>i</i> )          | --               | 137.35                             | 138.48                             | 138.90             | 138.85             | 137.89            |
| Triethylamine (89°C)                                                                                                   | CH <sub>3</sub>        | 9.07             | 11.74                              | 12.49                              | 12.38              | 11.09              | 11.61             |
|                                                                                                                        | CH <sub>2</sub>        | 47.19            | 45.74                              | 47.07                              | 47.10              | 46.96              | 46.25             |
| γ-Valerolactone <sup>b</sup> (207°C)  | CH <sub>3</sub>        | 22.80            | 20.64                              | 21.21                              | 21.23              | R                  | 21.09             |
|                                                                                                                        | CH <sub>2</sub> C=O    | 31.75            | 28.50                              | 29.37                              | 29.69              | --                 | 29.09             |
|                                                                                                                        | CH <sub>2</sub> CH(Me) | 31.97            | 28.98                              | 29.69                              | 30.28              | --                 | 29.73             |
|                                                                                                                        | CH                     | 82.98            | 76.62                              | 77.46                              | 78.18              | --                 | 77.24             |
|                                                                                                                        | CO                     | 185.24           | 177.02                             | 177.21                             | 178.35             | --                 | 177.19            |
| <i>p</i> -Xylene (138°C)              | CH <sub>3</sub>        | 22.79            | 20.47                              | 20.94                              | 21.02              | 21.03              | 20.95             |
|                                                                                                                        | CH                     | 131.92           | 128.66                             | 129.65                             | 129.87             | 129.84             | 128.90            |
|                                                                                                                        | C                      | 188.56           | 133.98                             | 135.24                             | 135.70             | 135.71             | 134.67            |
